# Supplementary material for: A geometric attractor mechanism for self-organization of entorhinal grid modules
Source: eLife journal article supplement (doi:10.7554/elife.46687), 2019-08-02
Supplement: supp [file elife-46687-supp-v1.zip]

Archive with 16 entries (16 files):
- elife_poa_e46687_Figure_5_figure_supplement_1.pdf
- elife_poa_e46687_Transparent_Reporting_File.docx
- elife_poa_e46687_Figure_7_figure_supplement_1.pdf
- elife_poa_e46687_Figure_5_figure_supplement_1.pdf
- elife_poa_e46687_Figure_4_figure_supplement_3.pdf
- elife_poa_e46687_Source_code_1.c
- elife_poa_e46687_Figure_8_figure_supplement_1.pdf
- elife_poa_e46687_Figure_4_figure_supplement_2.pdf
- elife_poa_e46687_Figure_6_figure_supplement_1.pdf
- elife_poa_e46687_Figure_5_figure_supplement_3.pdf
- elife_poa_e46687_Appendix_2_video_1.mp4
- elife_poa_e46687_Figure_4_figure_supplement_1.pdf
- elife_poa_e46687_Figure_8_video_1.mov
- elife_poa_e46687_Figure_6_figure_supplement_2.pdf
- elife_poa_e46687_Figure_8_video_2.mov
- elife_poa_e46687_Figure_7_figure_supplement_2.pdf
