# Supplementary figures and images for: A geometric attractor mechanism for self-organization of entorhinal grid modules
Source: eLife journal article supplement (doi:10.7554/elife.46687), 2019-08-02

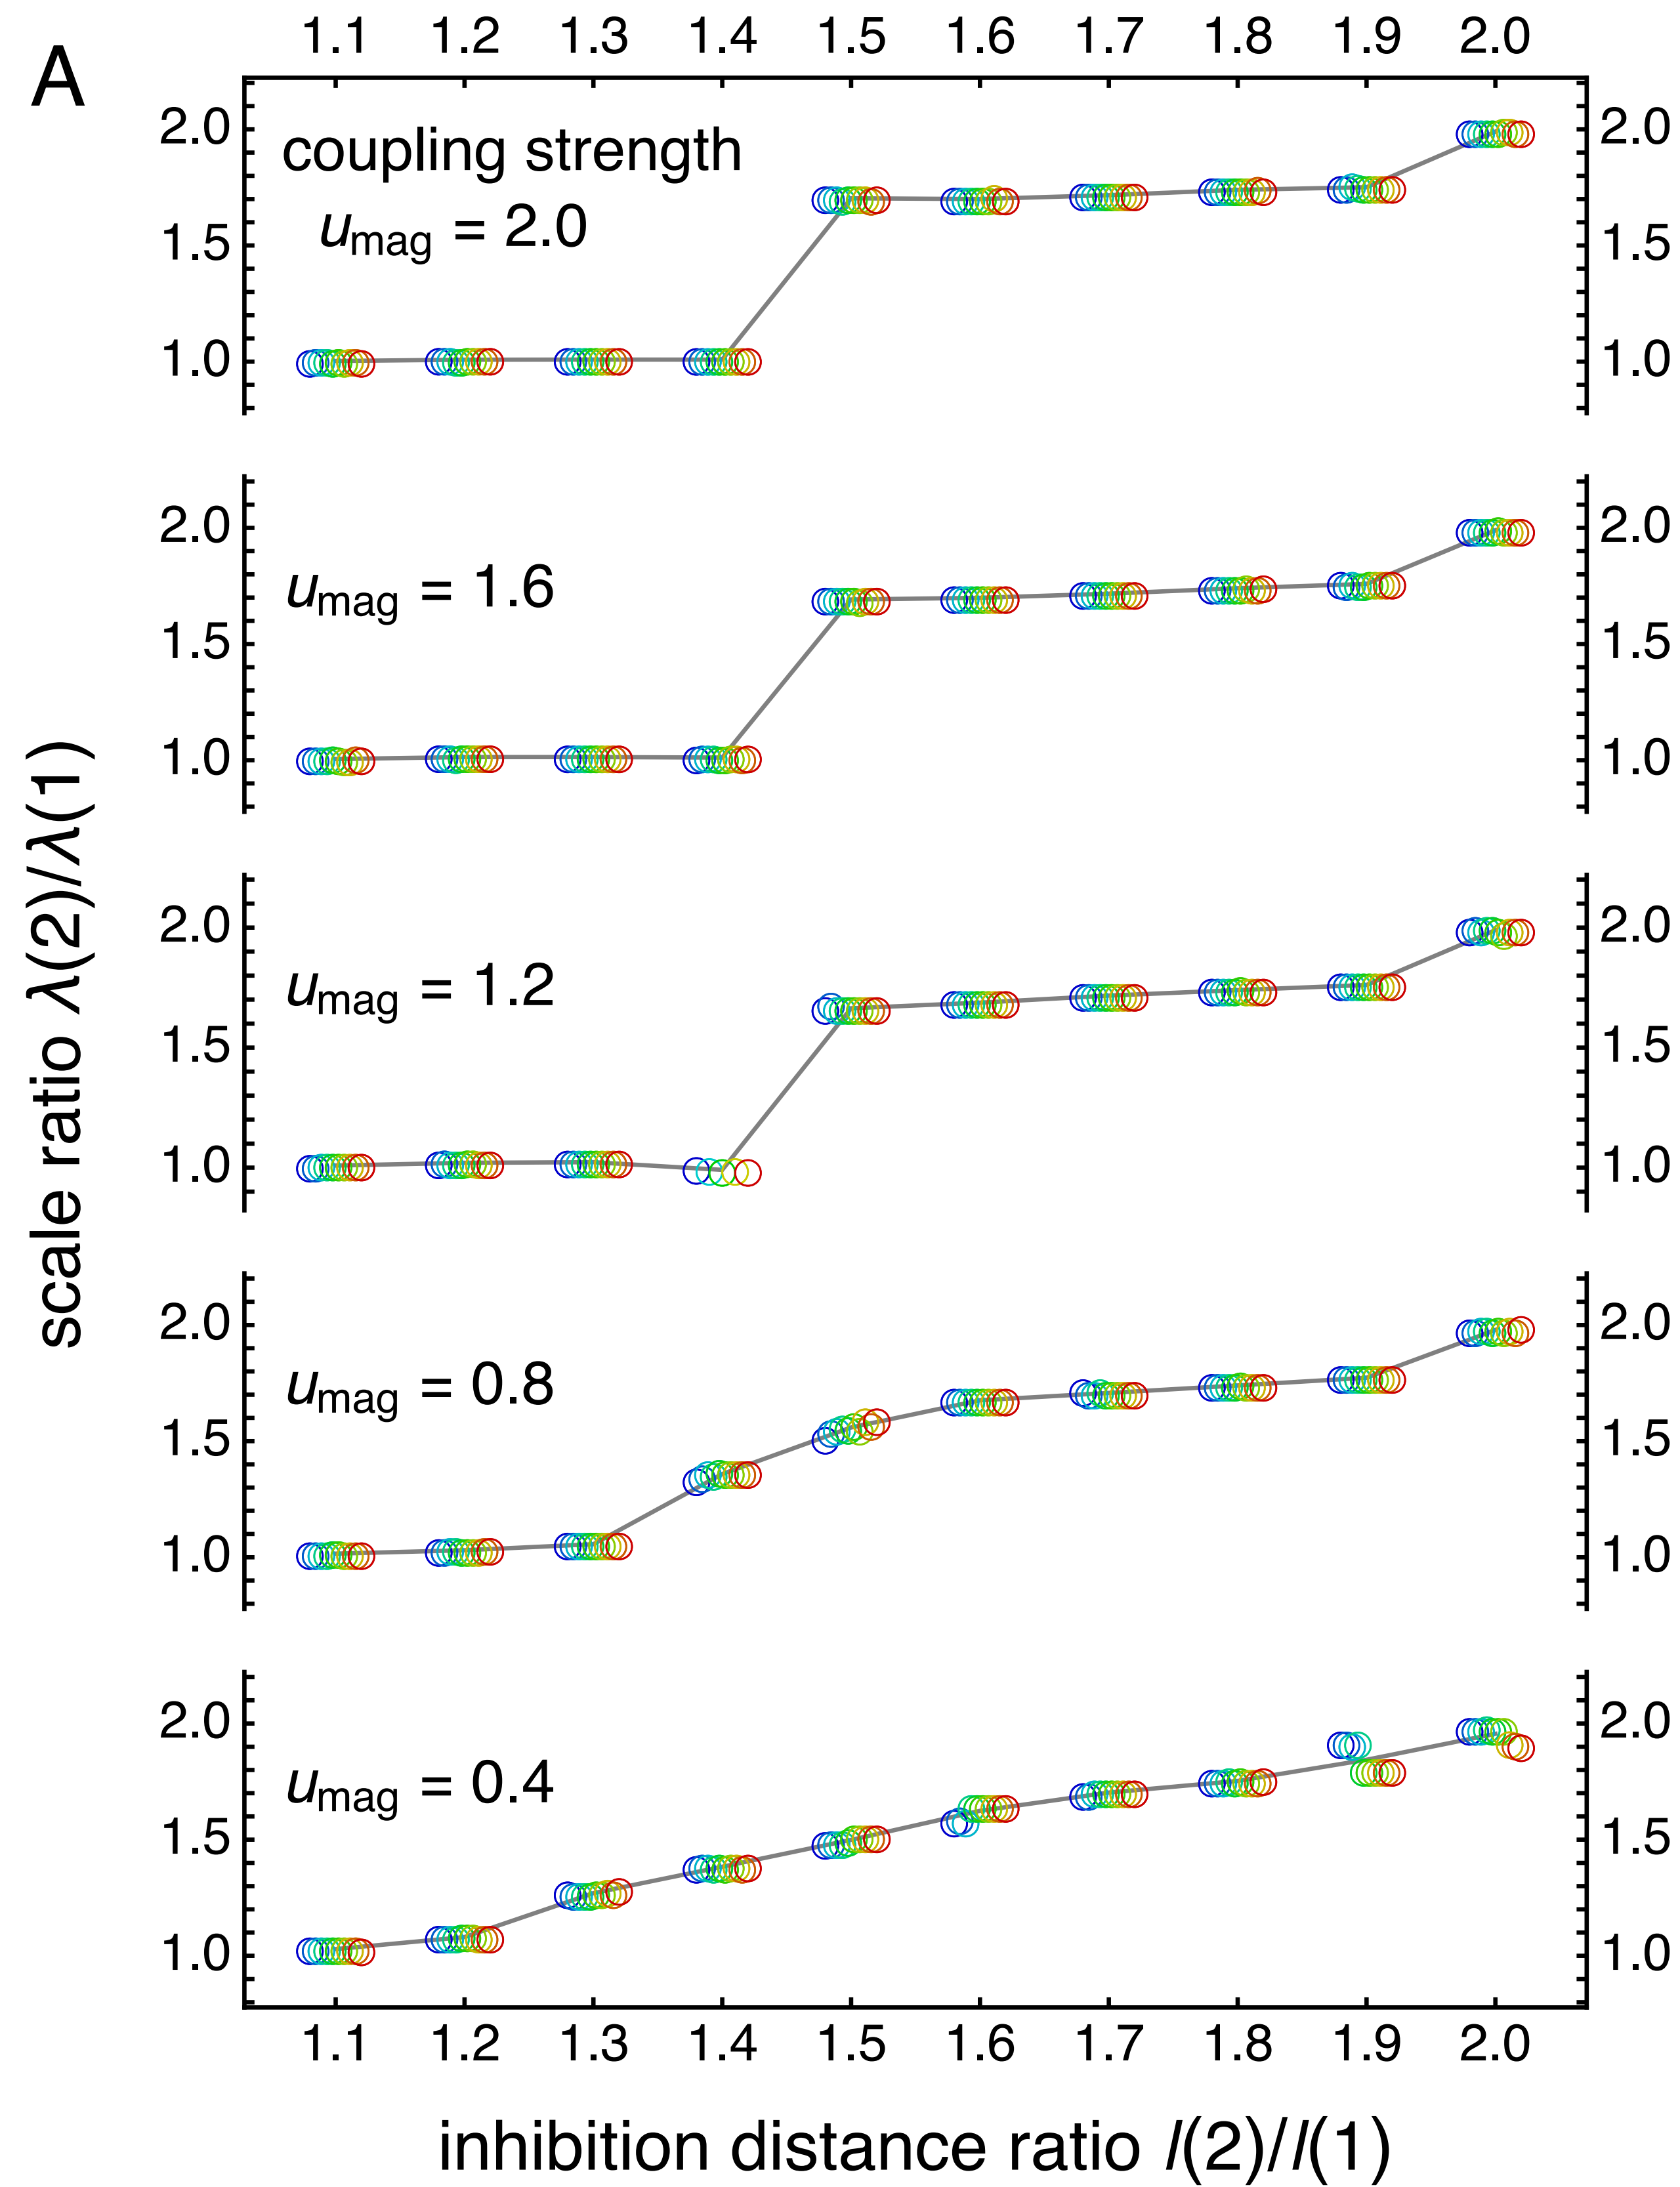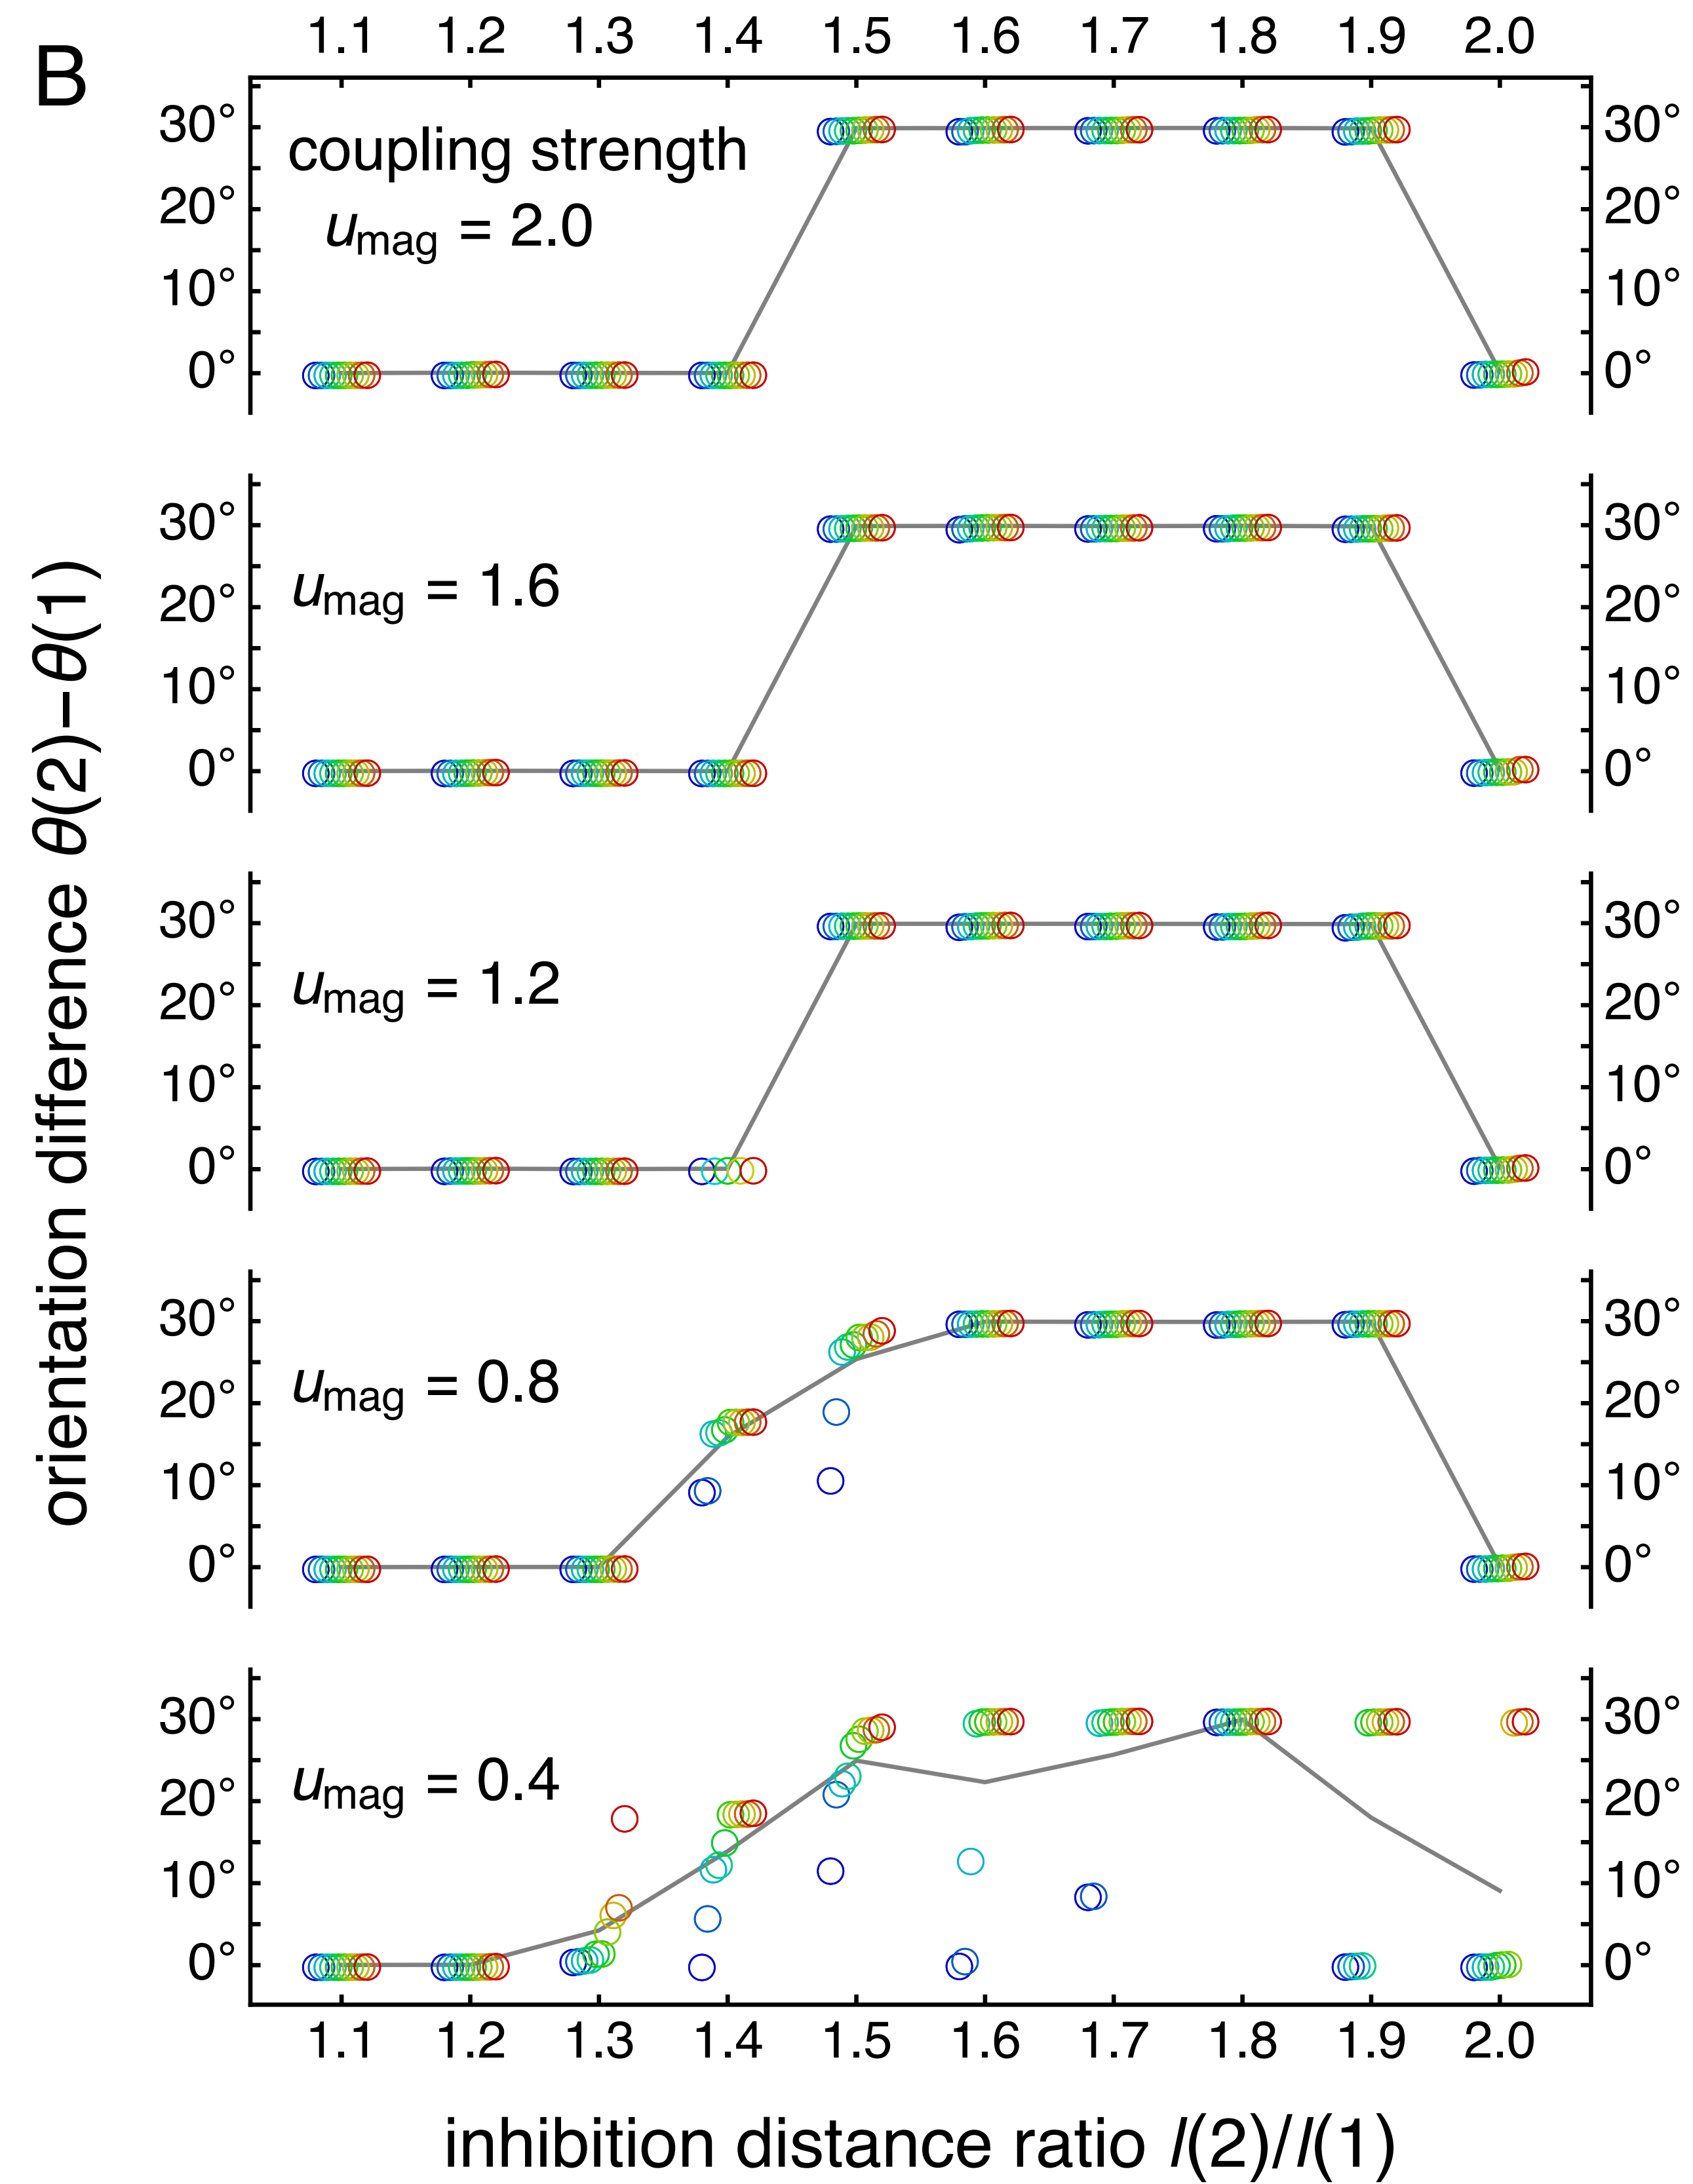

Supplement: supp [file elife-46687-supp-v1.zip › elife_poa_e46687_Figure_5_figure_supplement_1.pdf]

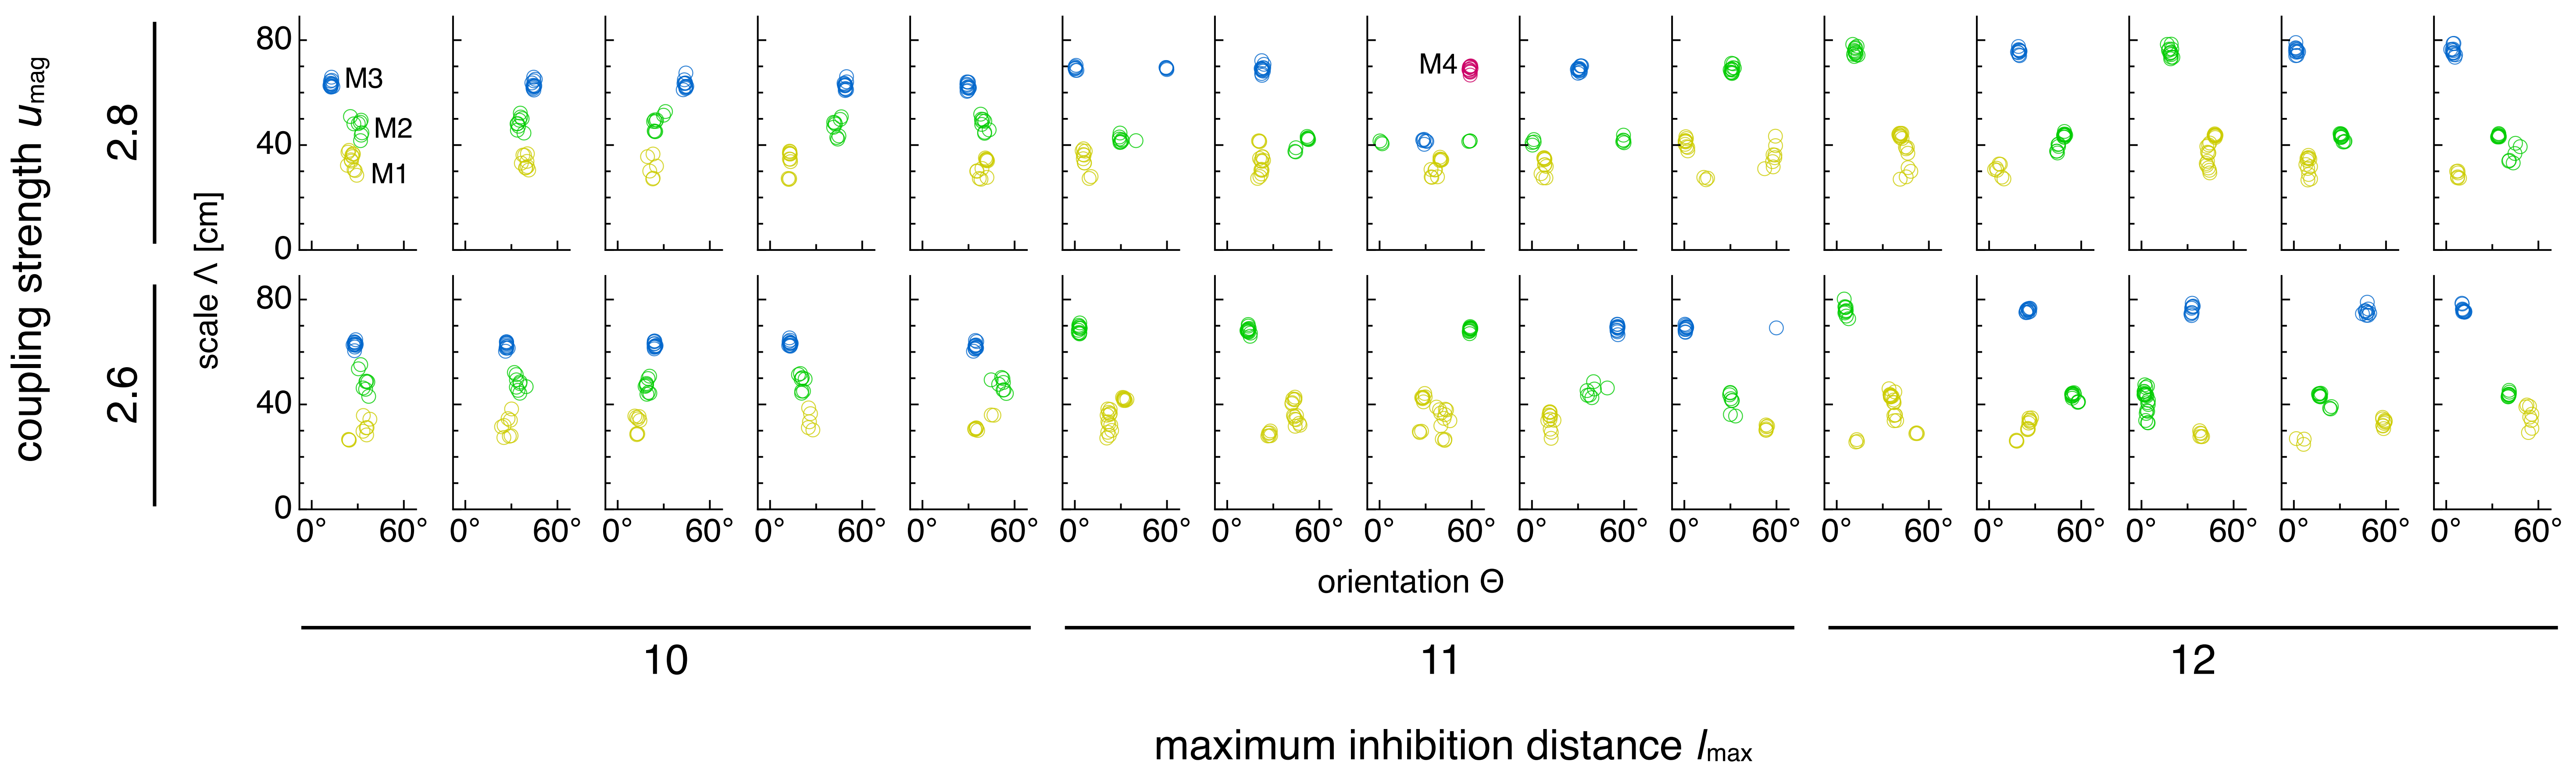

Supplement: supp [file elife-46687-supp-v1.zip › elife_poa_e46687_Figure_7_figure_supplement_1.pdf]

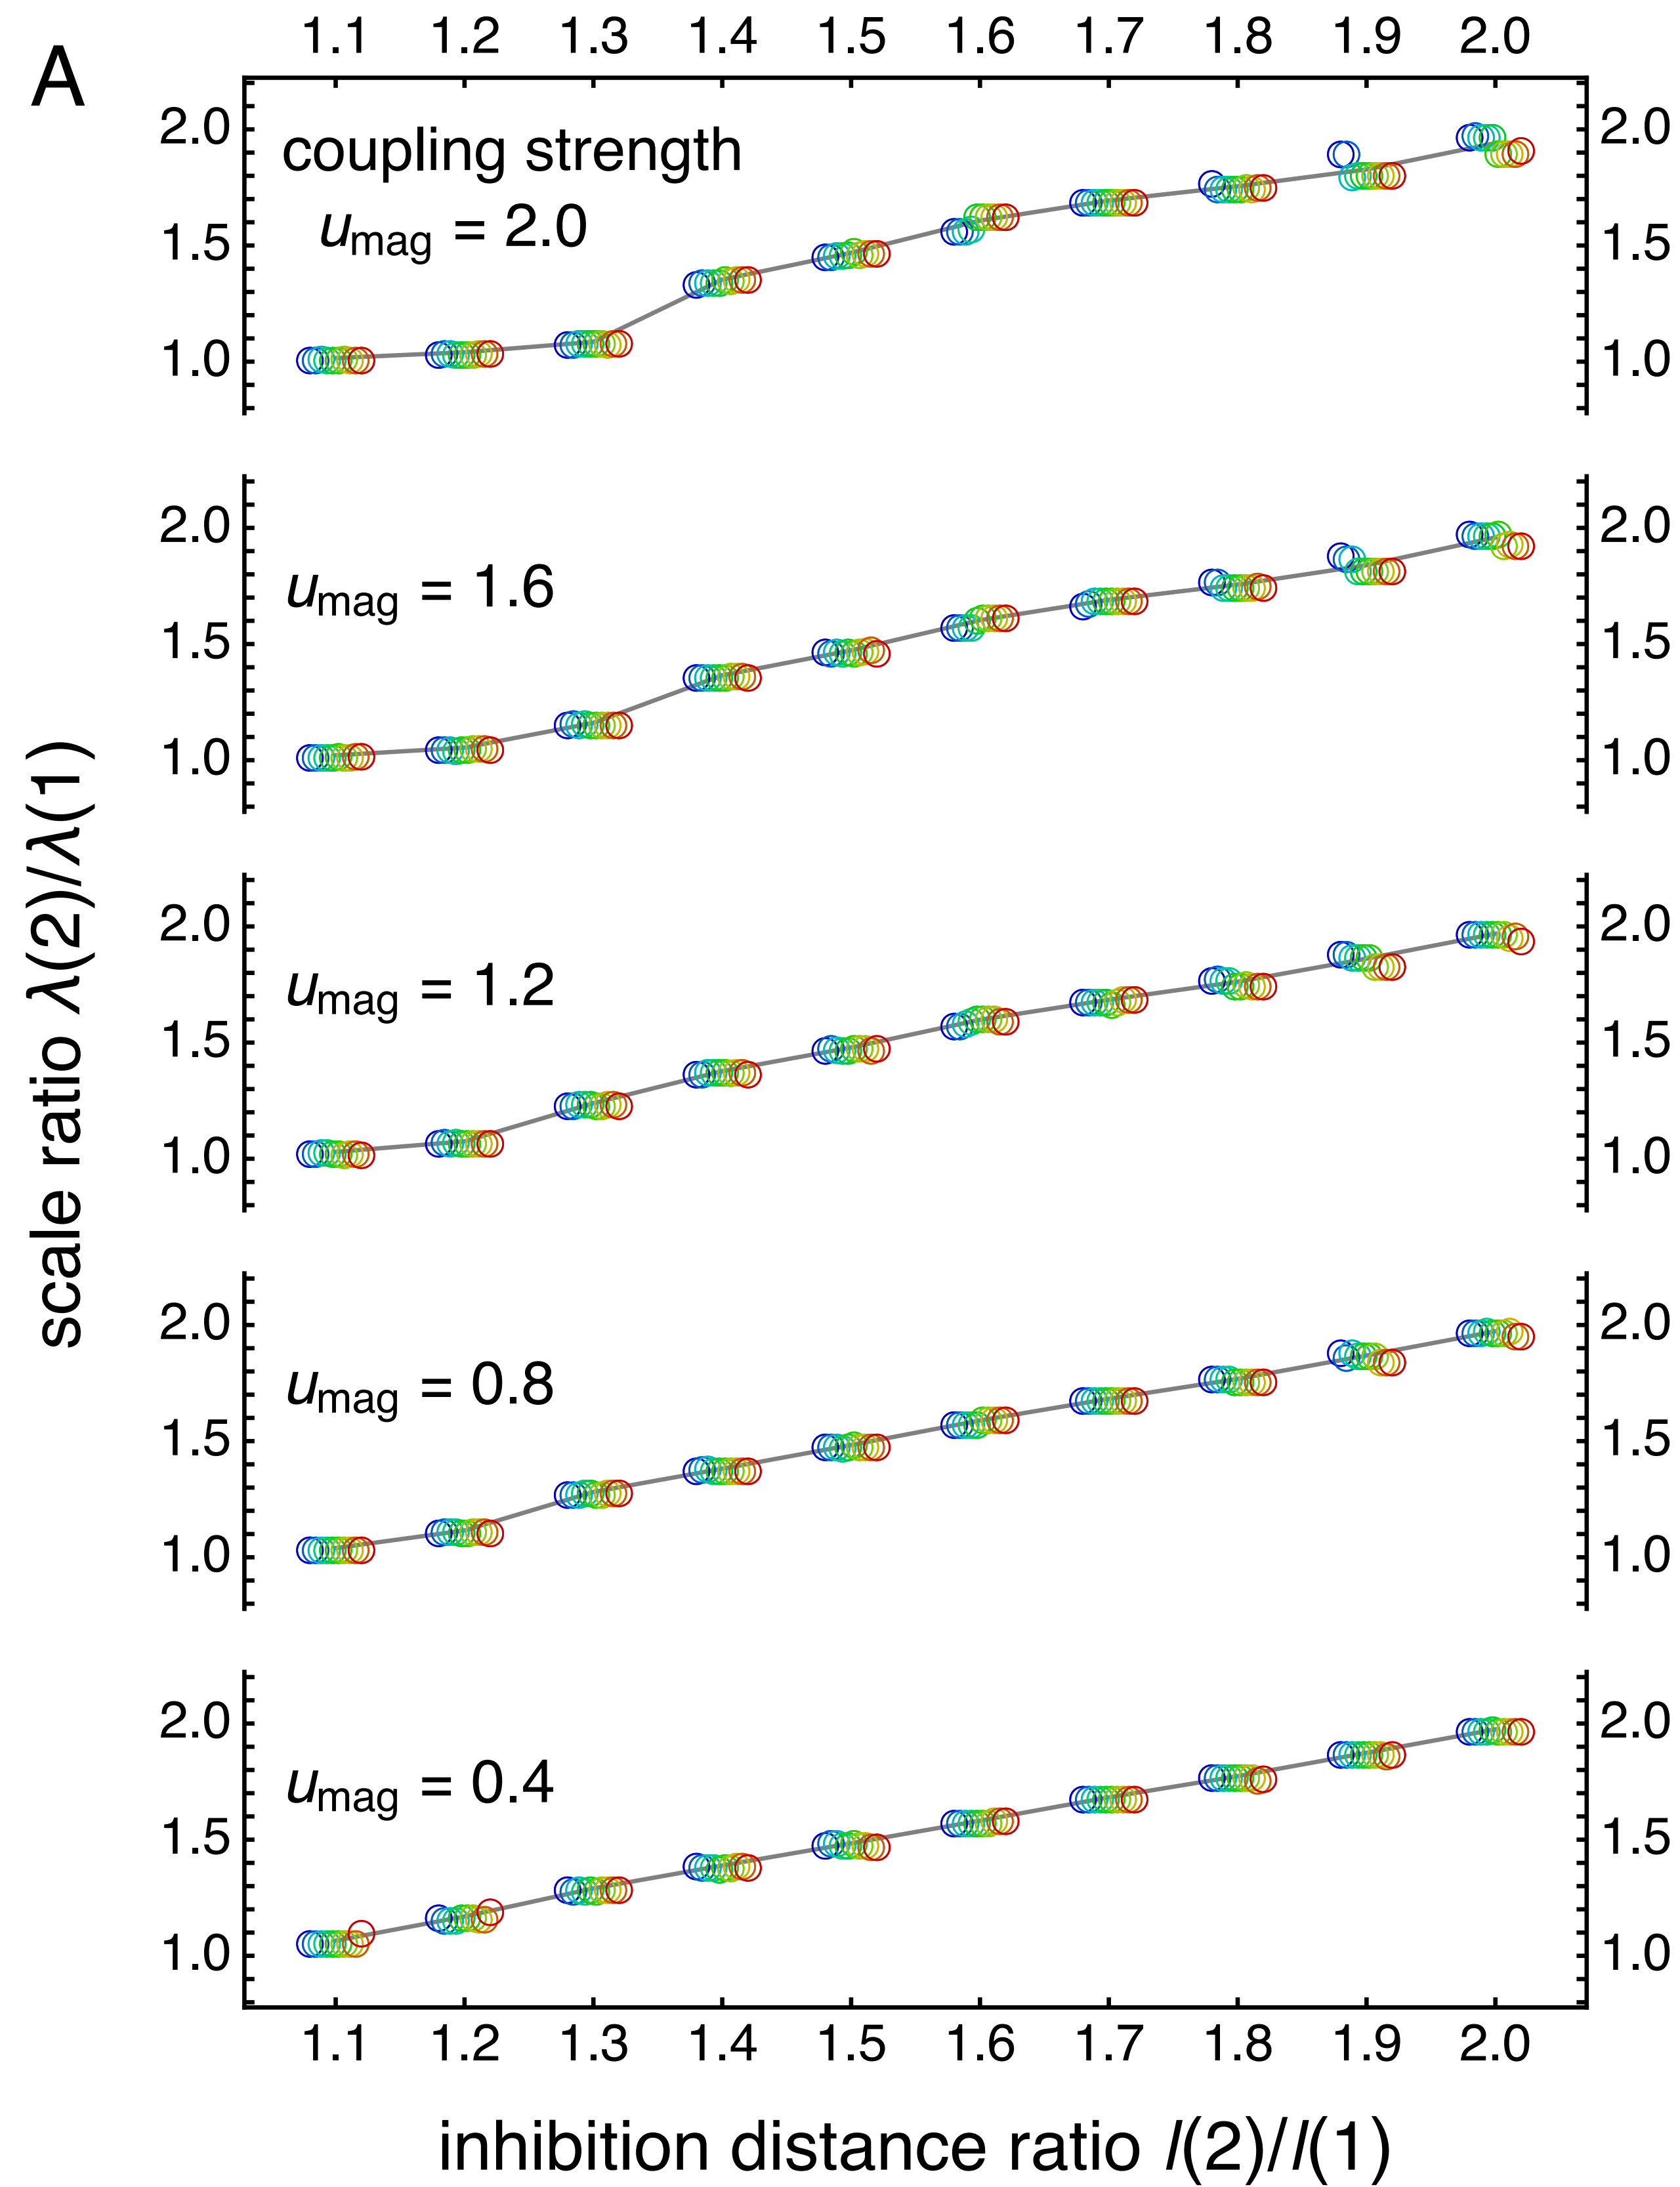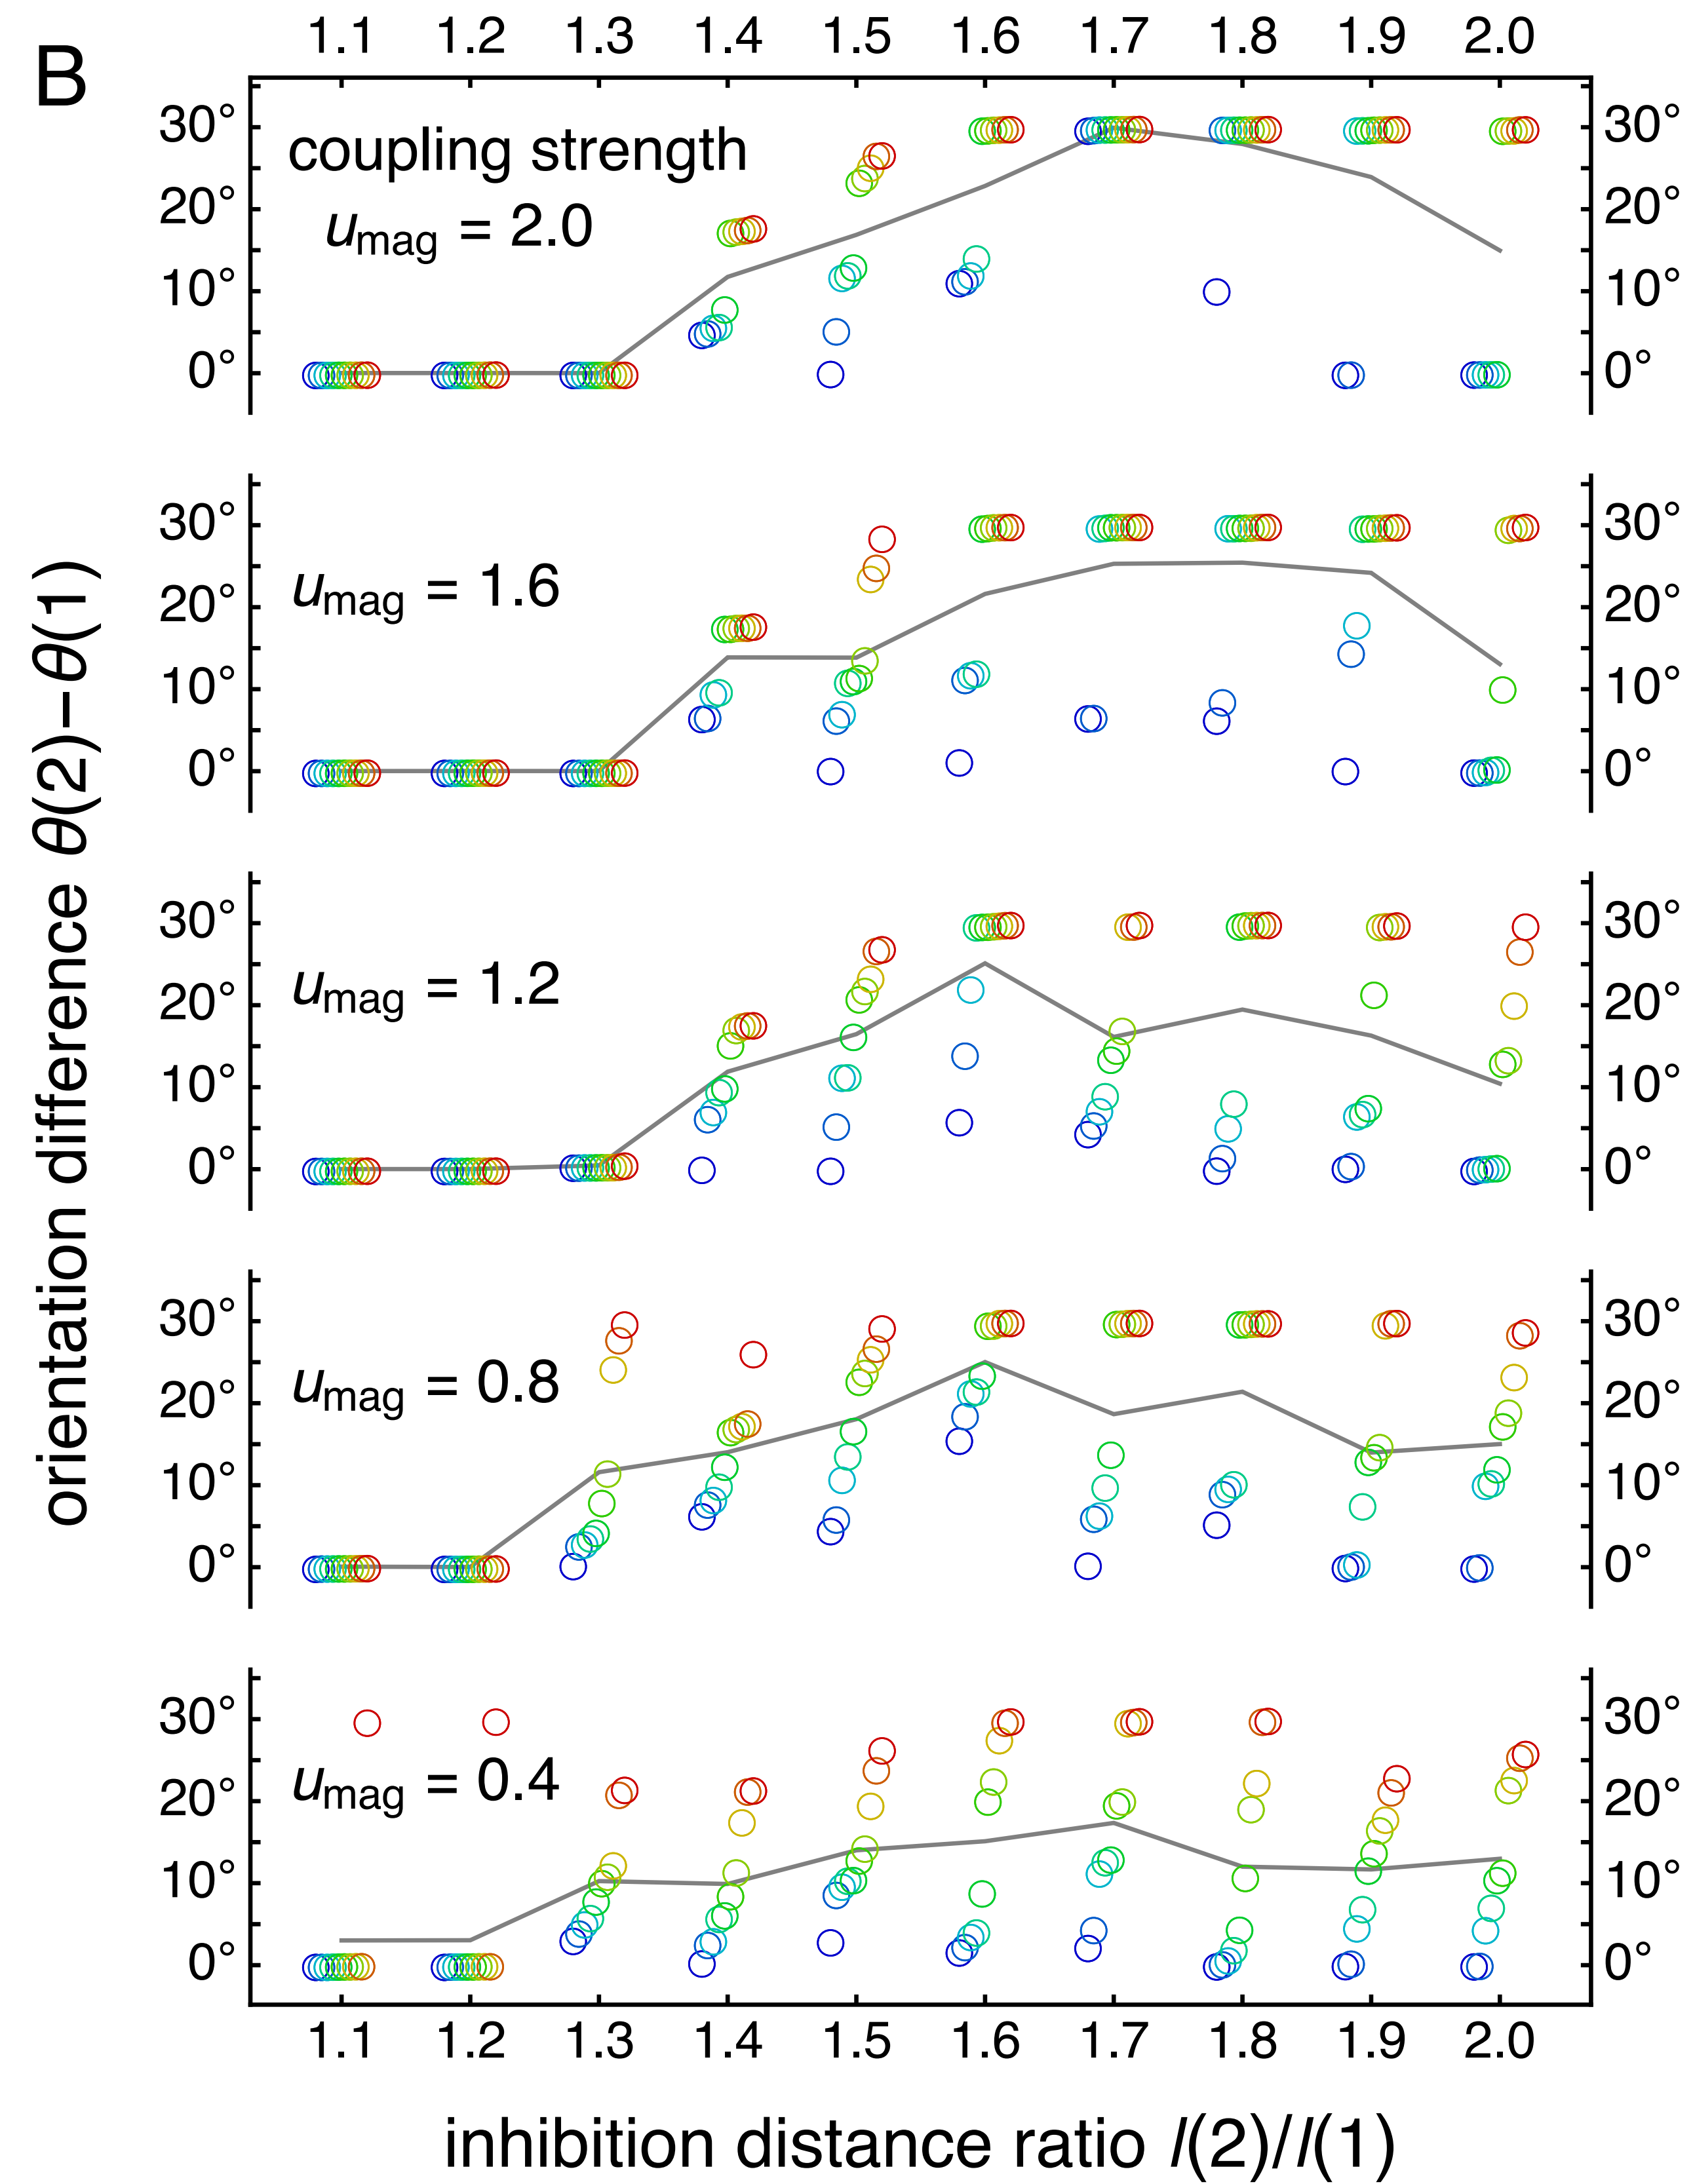

Supplement: supp [file elife-46687-supp-v1.zip › elife_poa_e46687_Figure_5_figure_supplement_1.pdf]

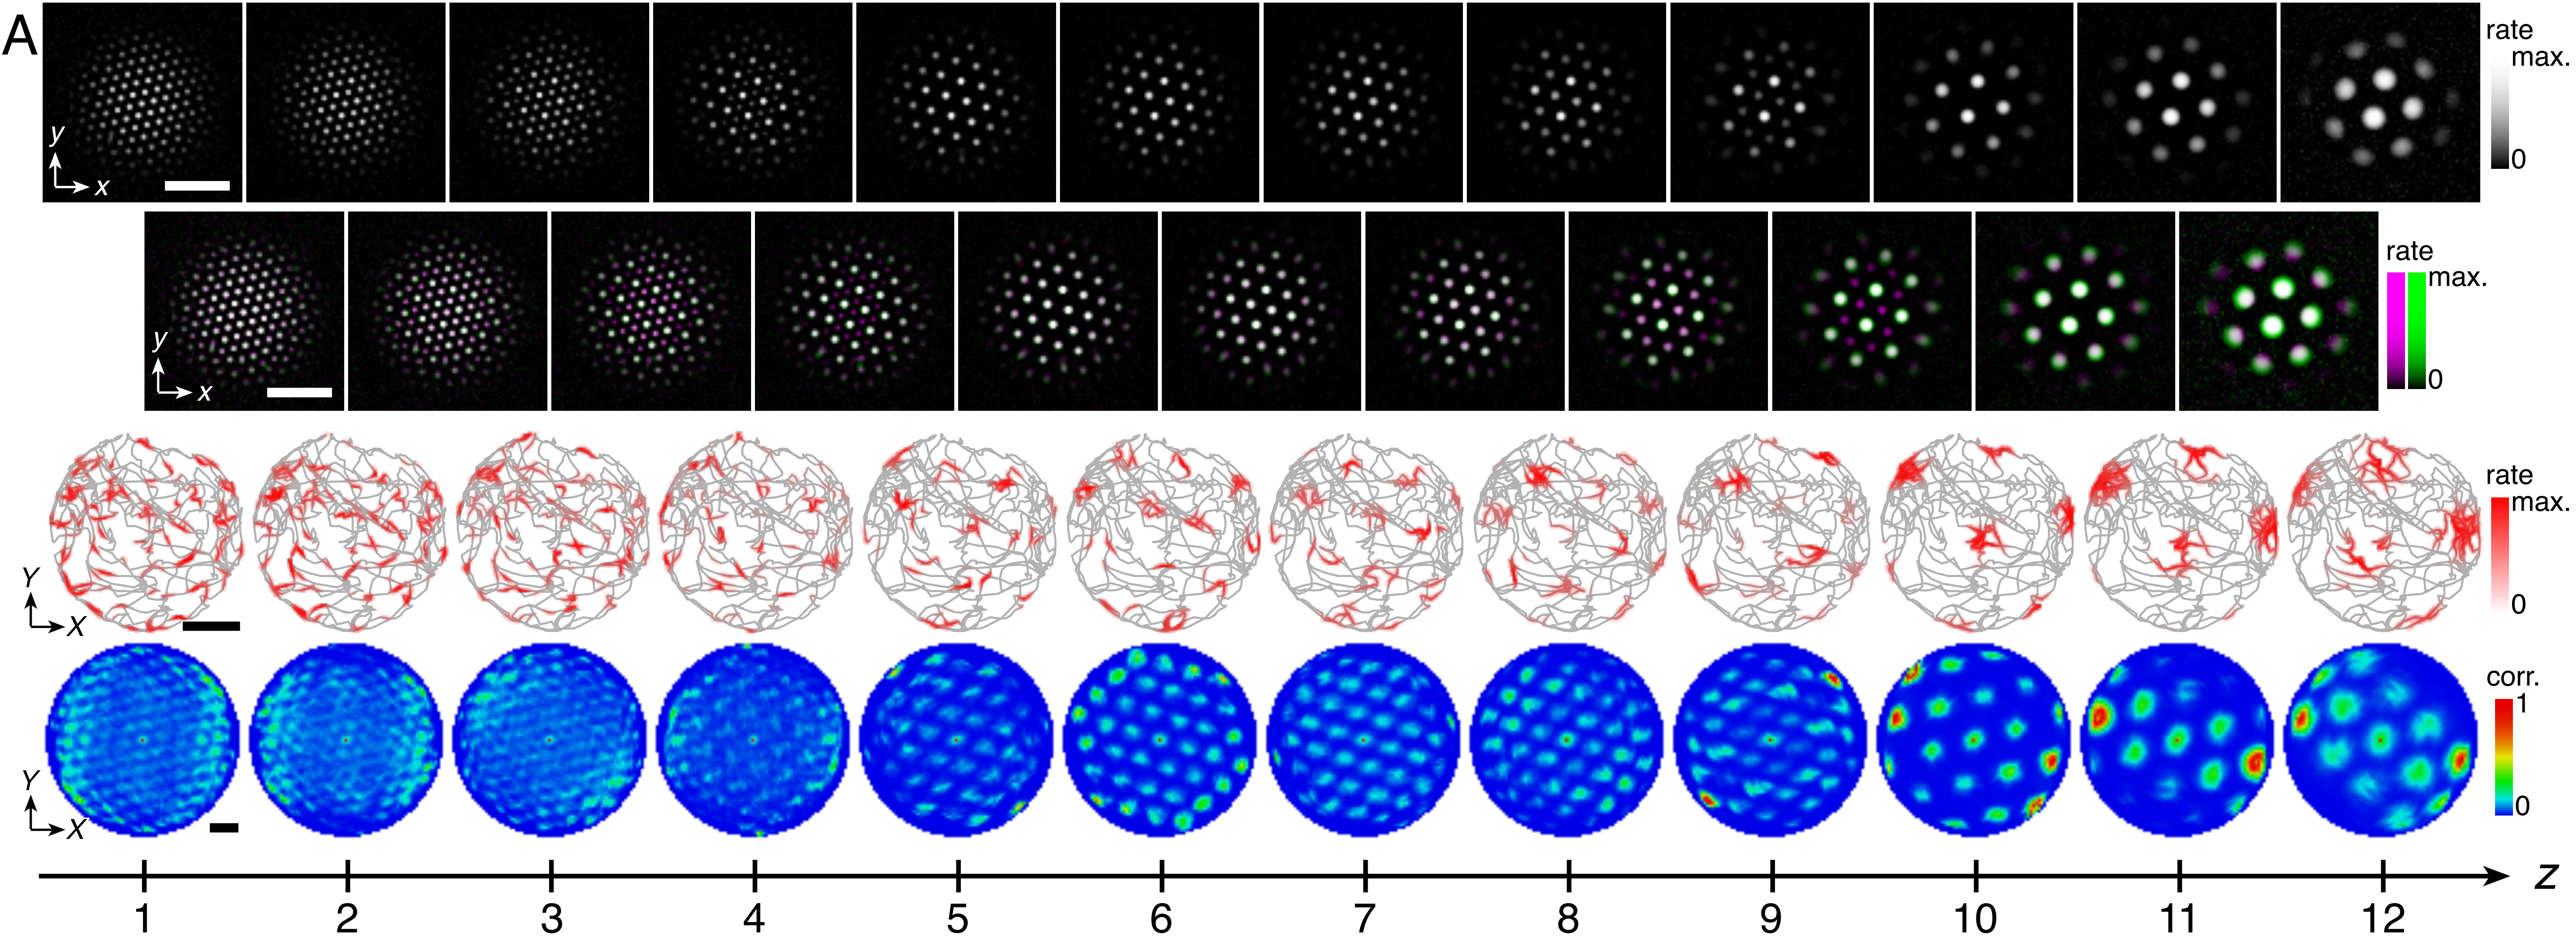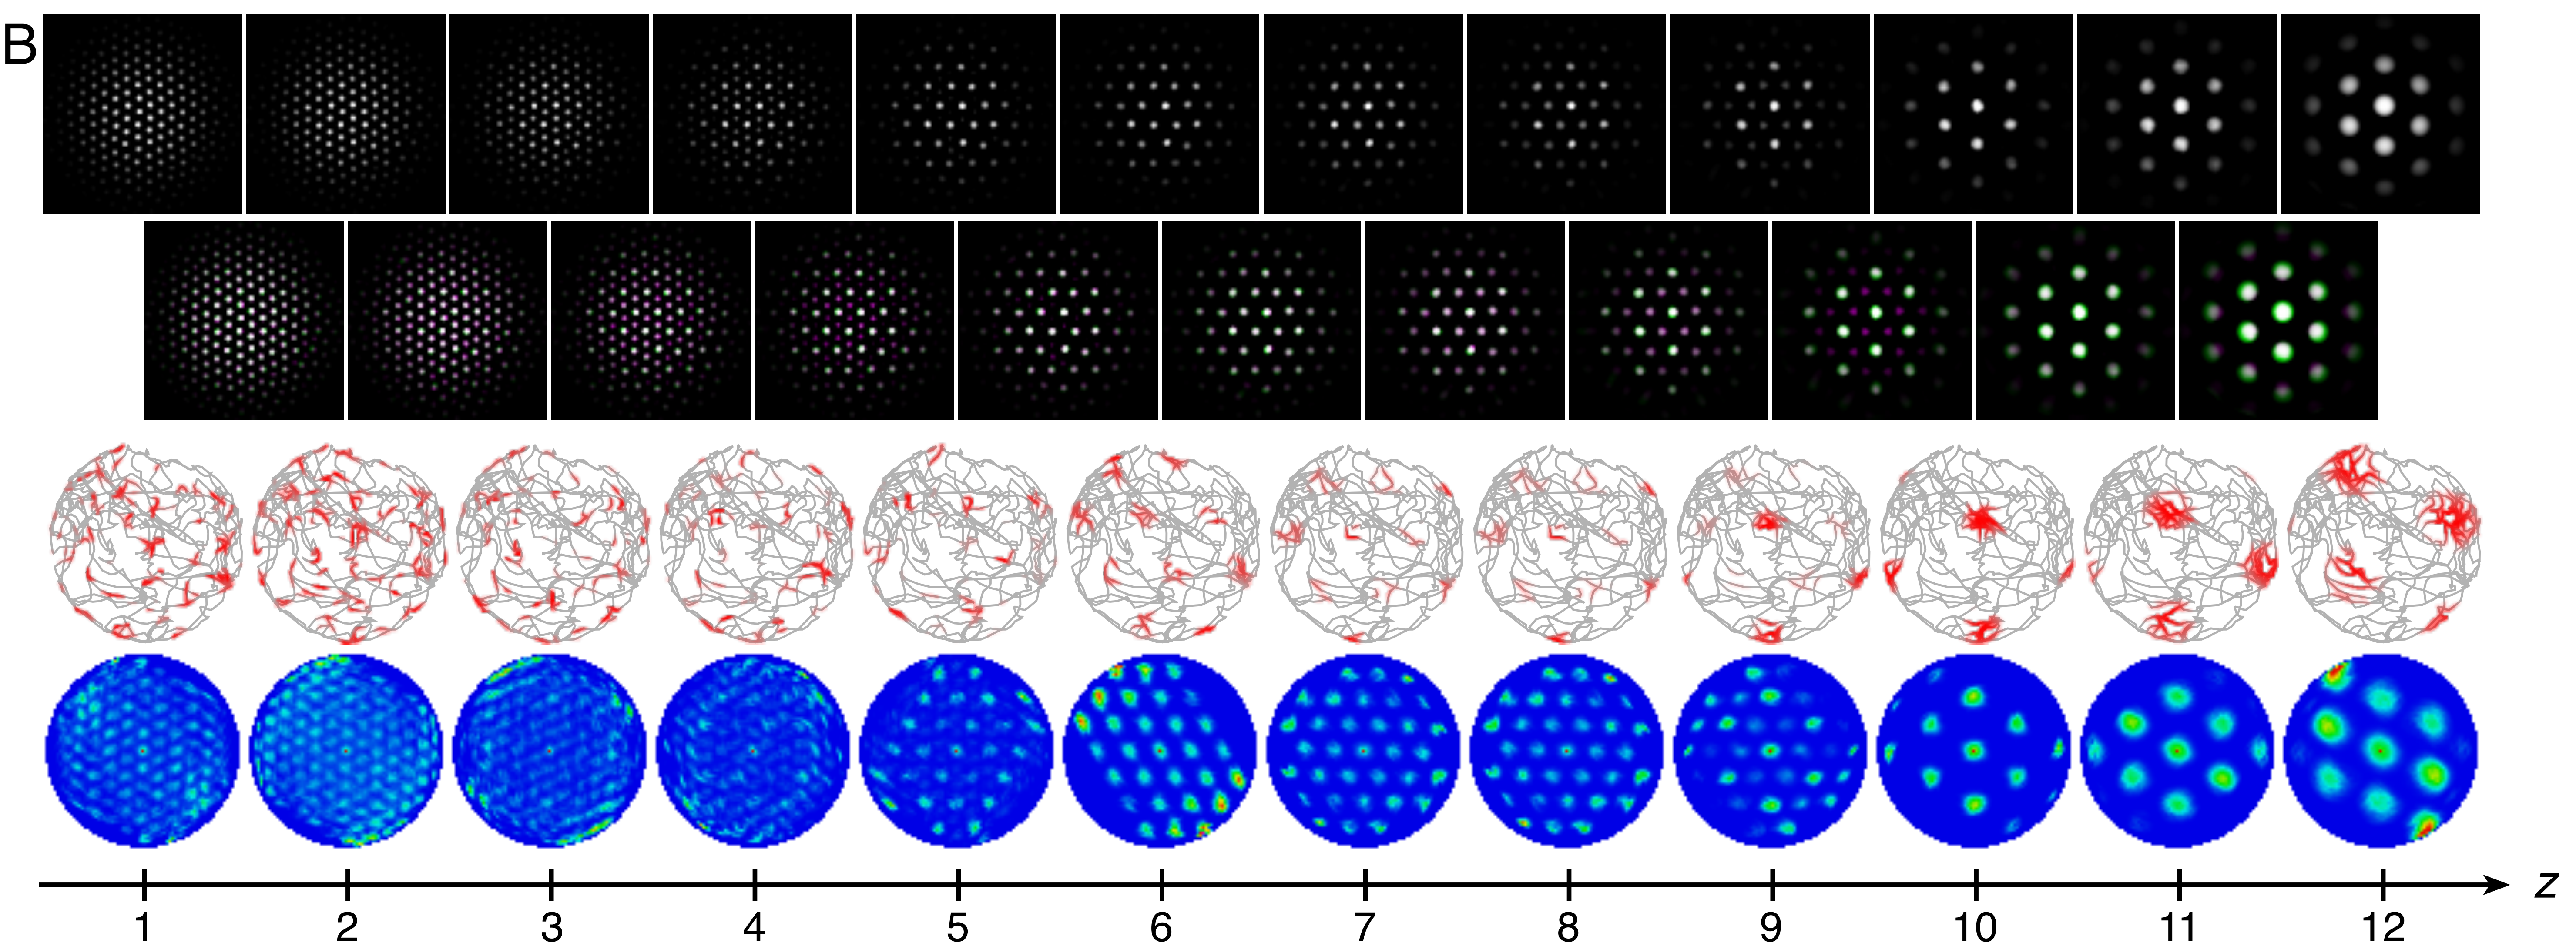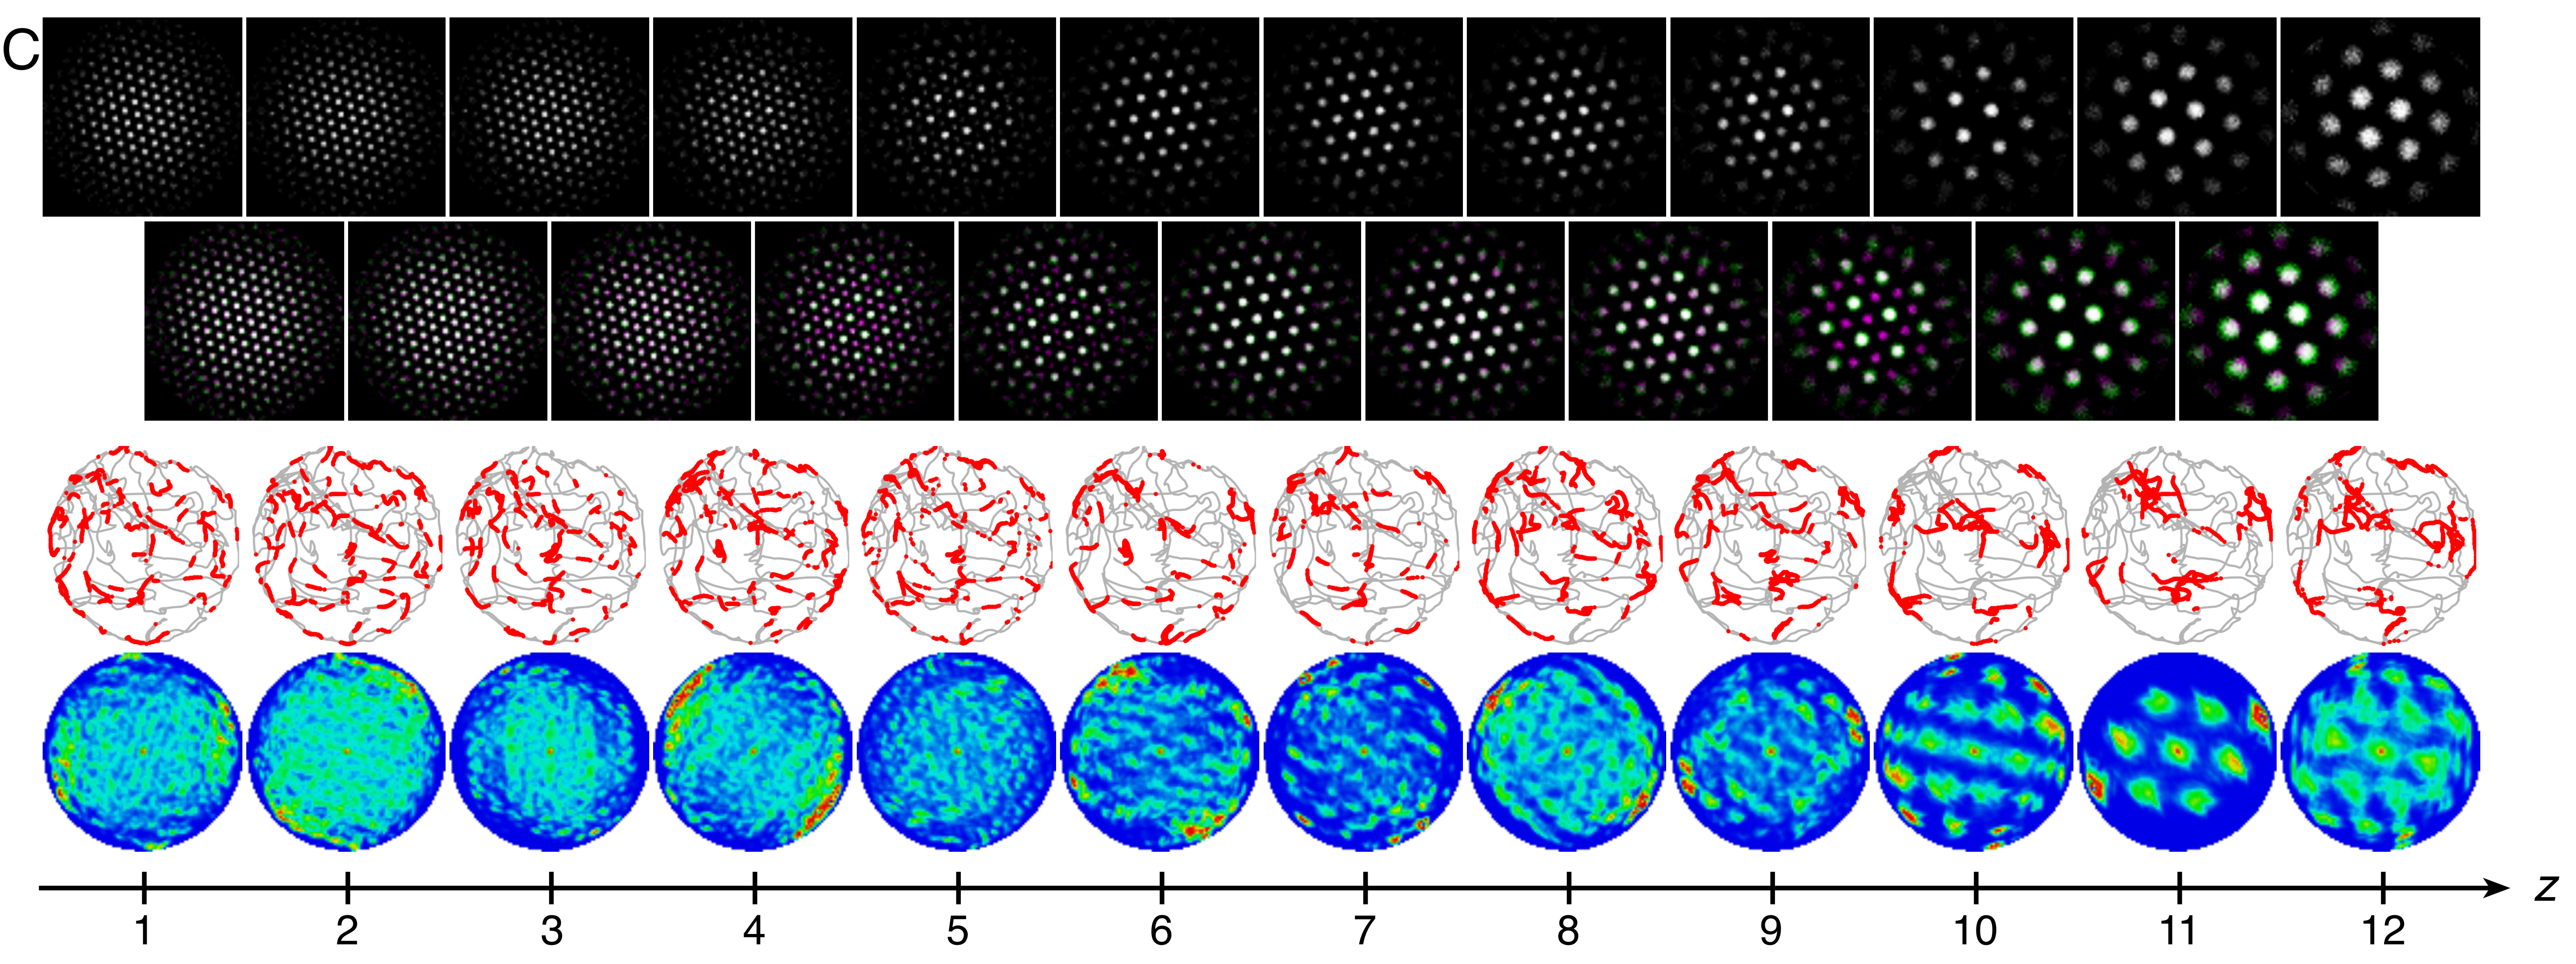

Supplement: supp [file elife-46687-supp-v1.zip › elife_poa_e46687_Figure_4_figure_supplement_3.pdf]

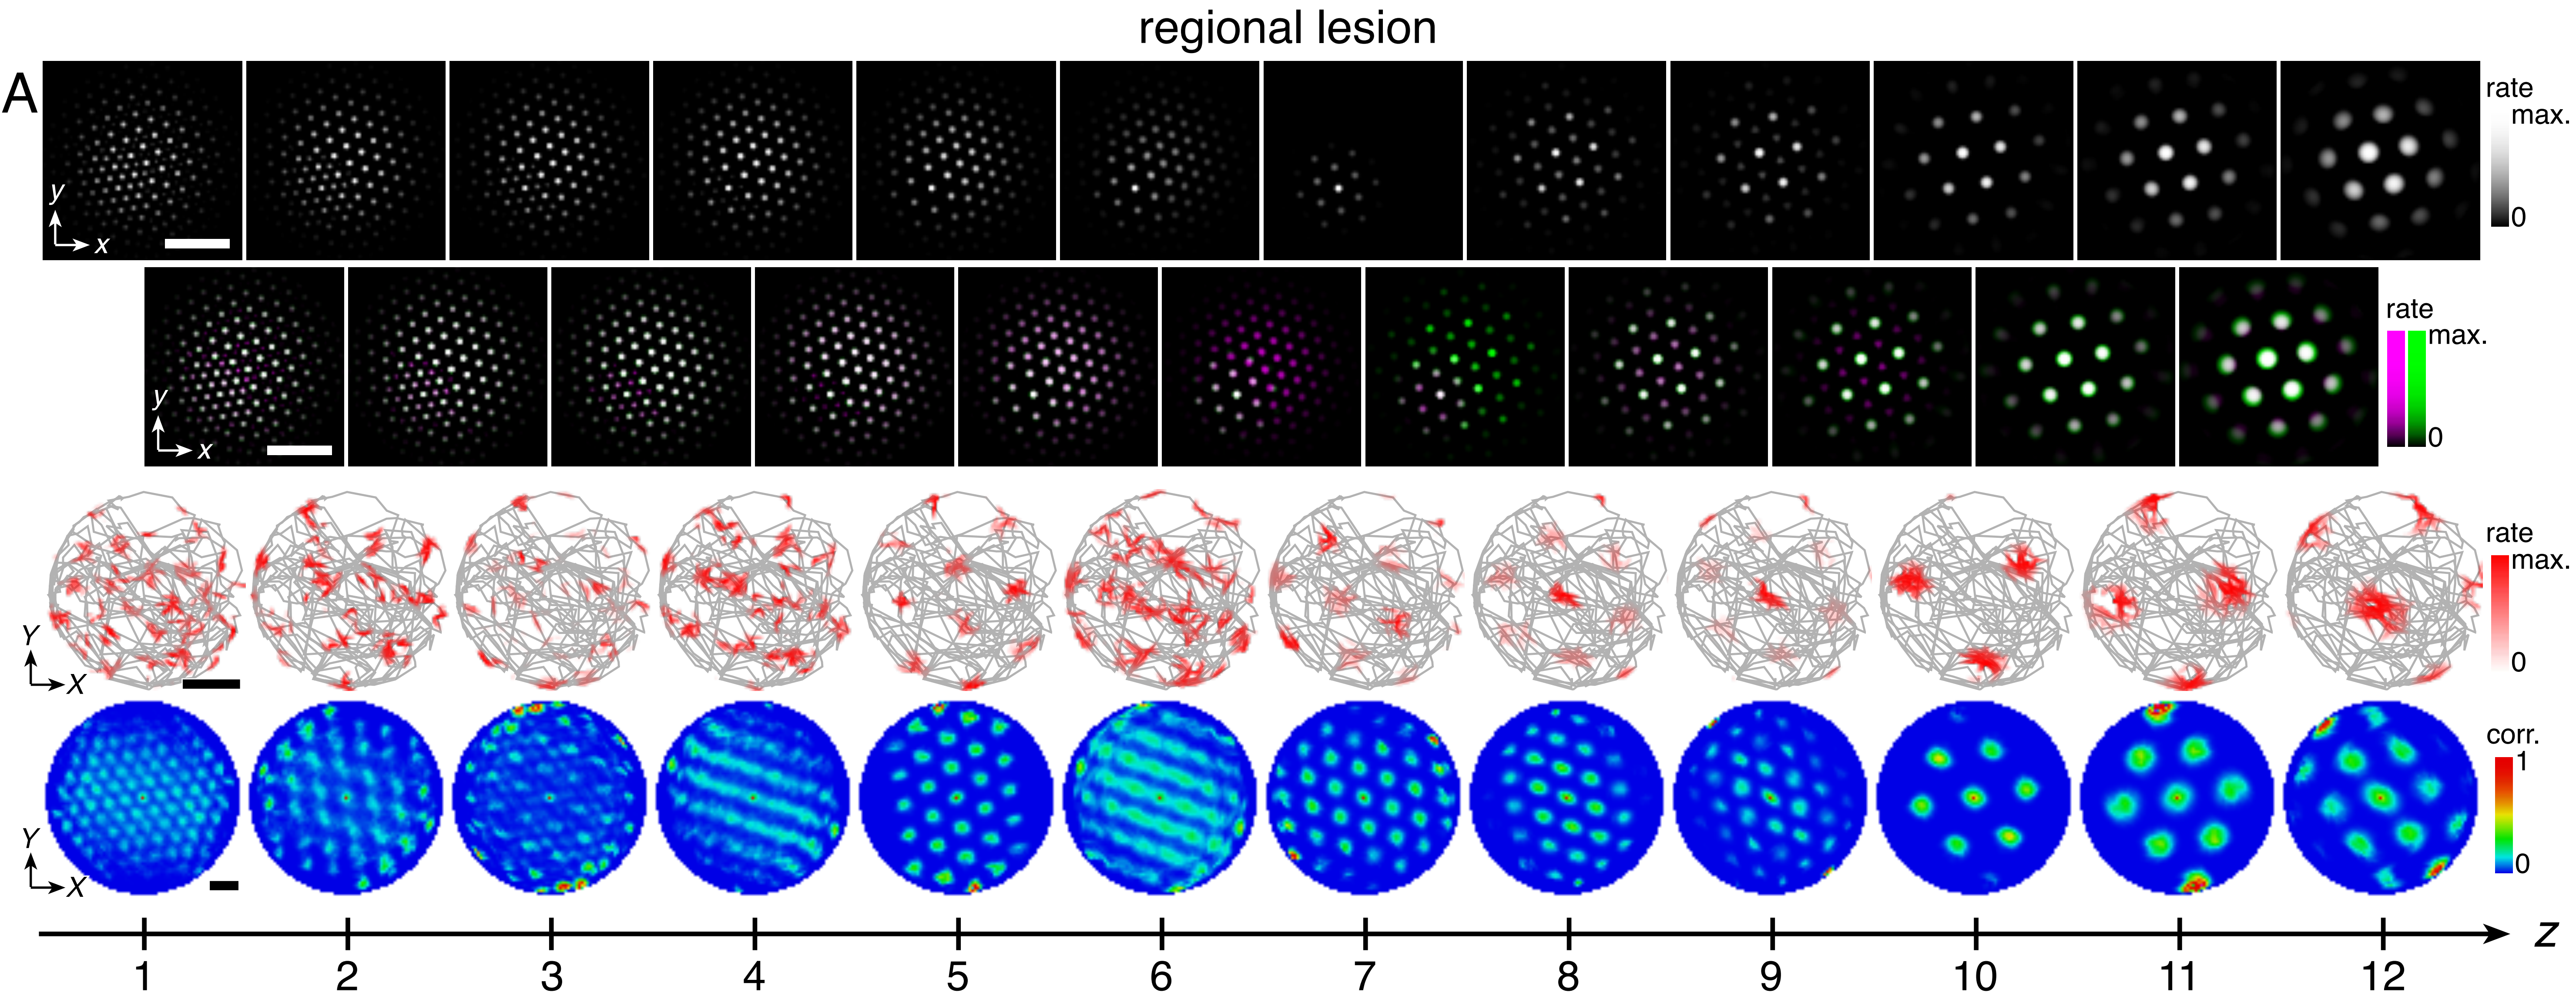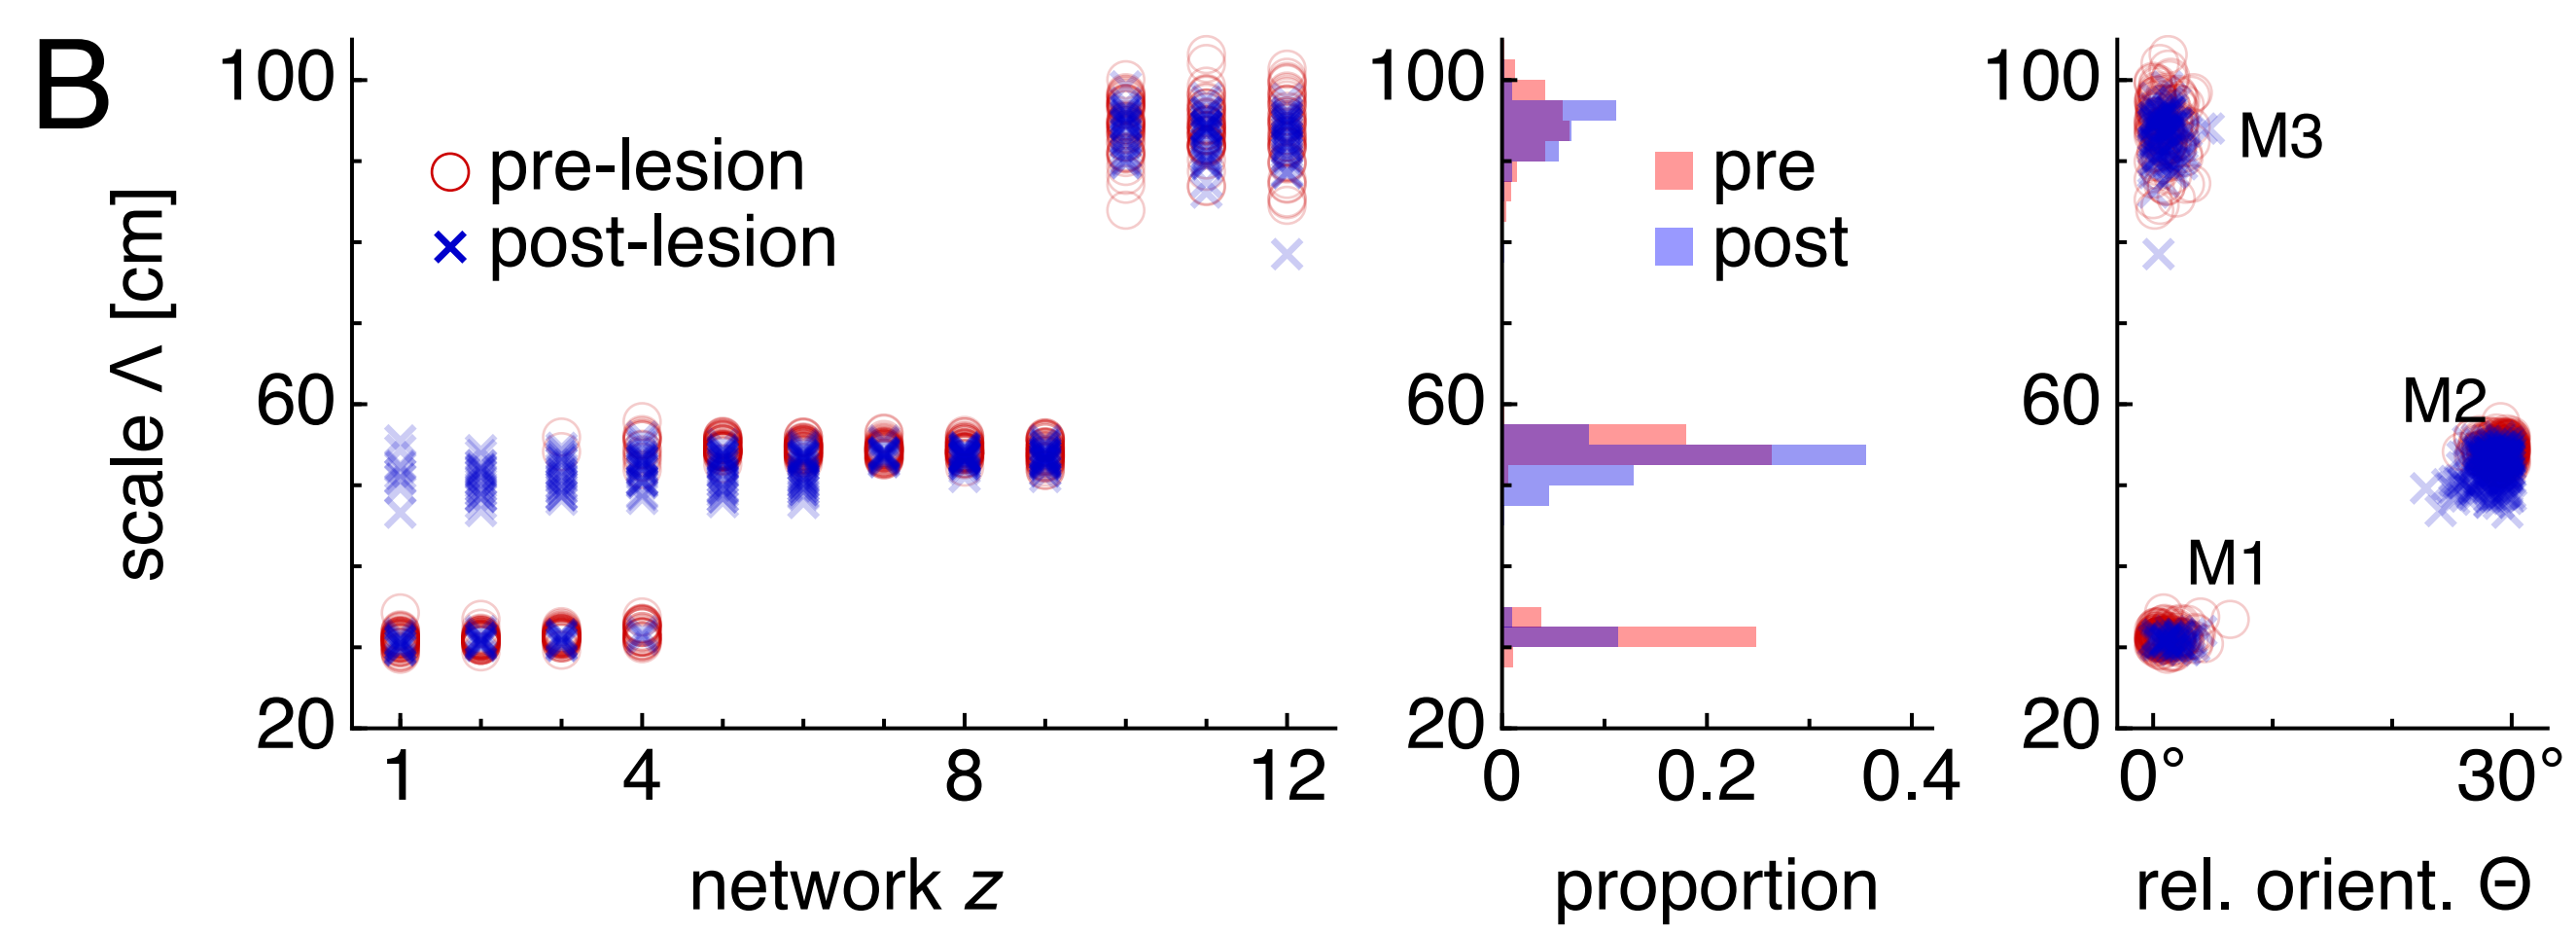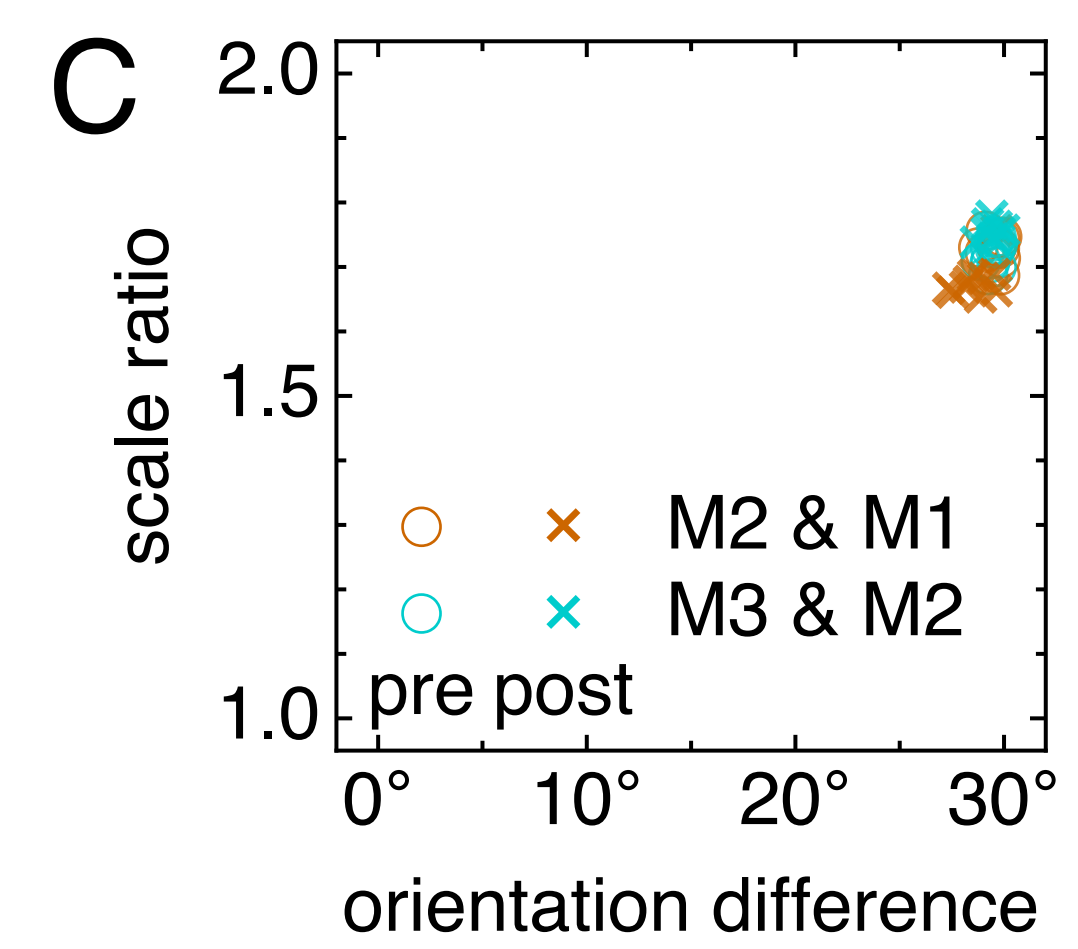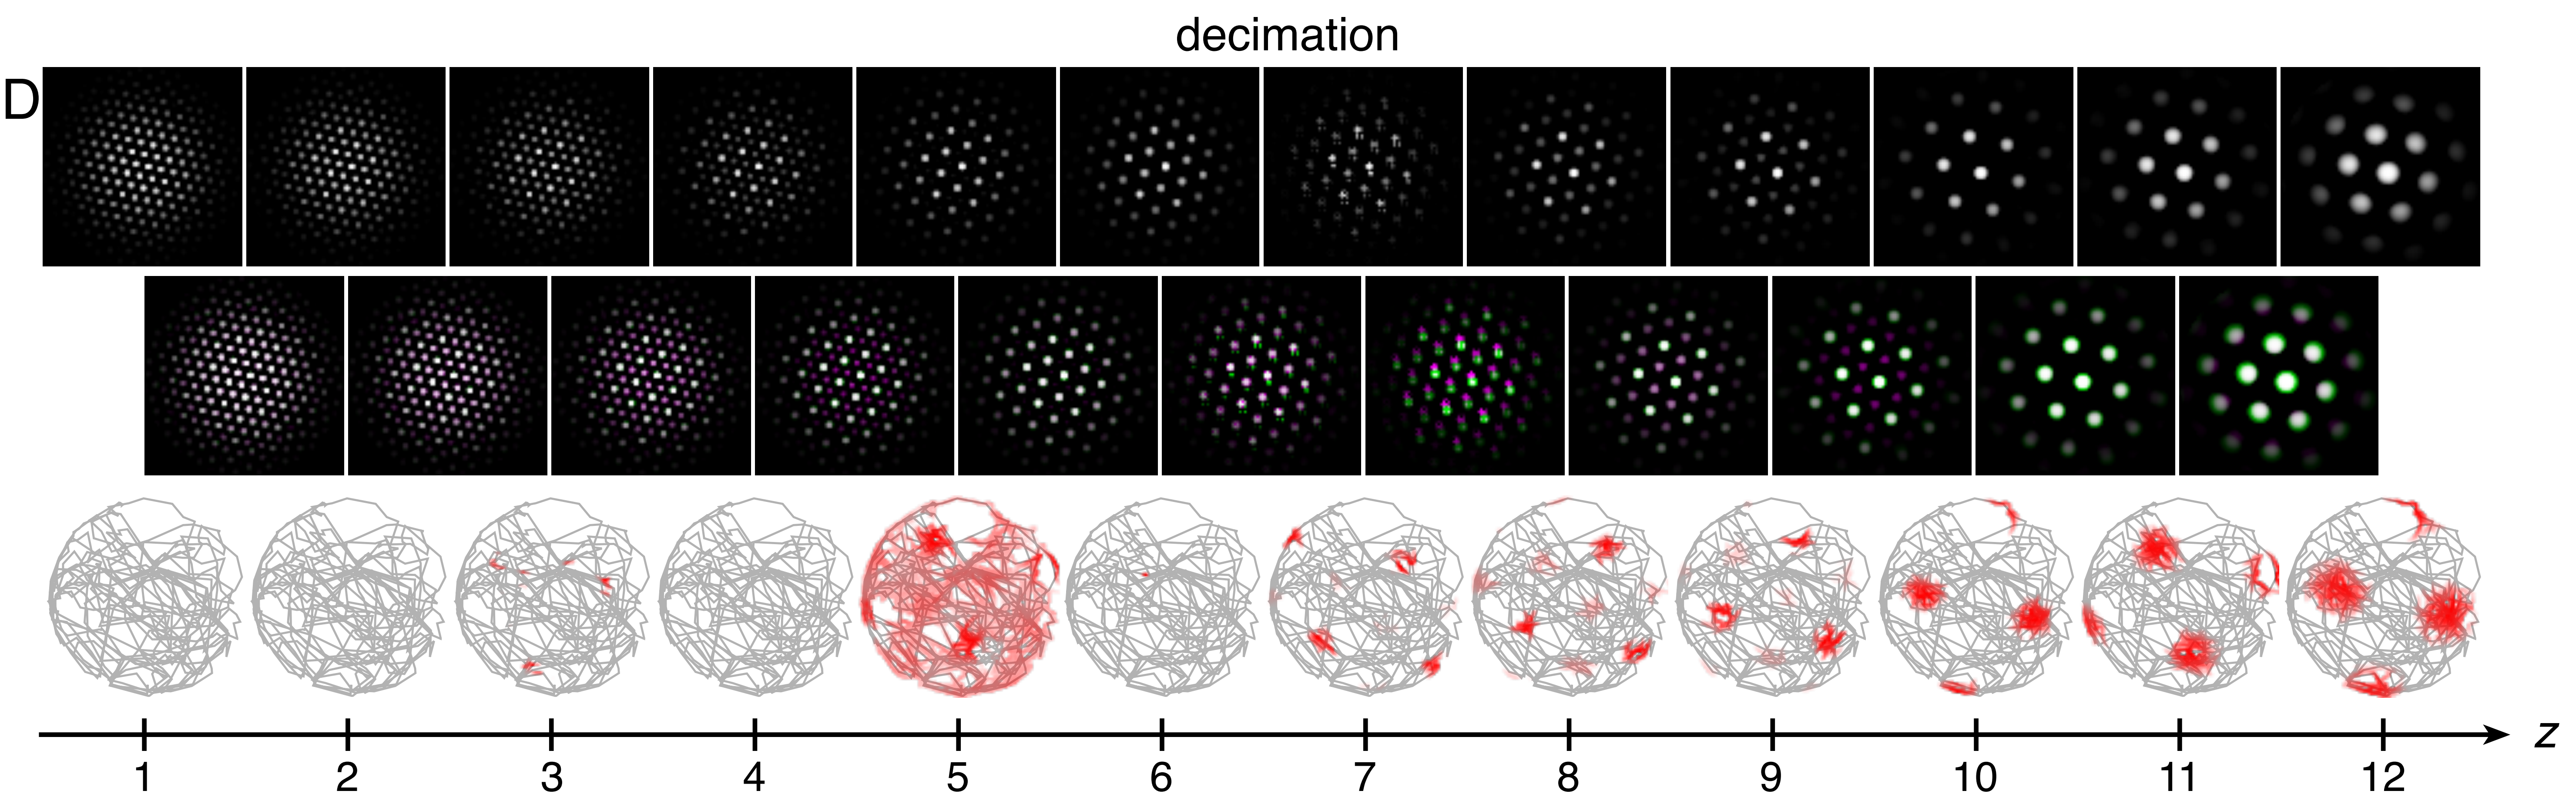

Supplement: supp [file elife-46687-supp-v1.zip › elife_poa_e46687_Figure_8_figure_supplement_1.pdf]

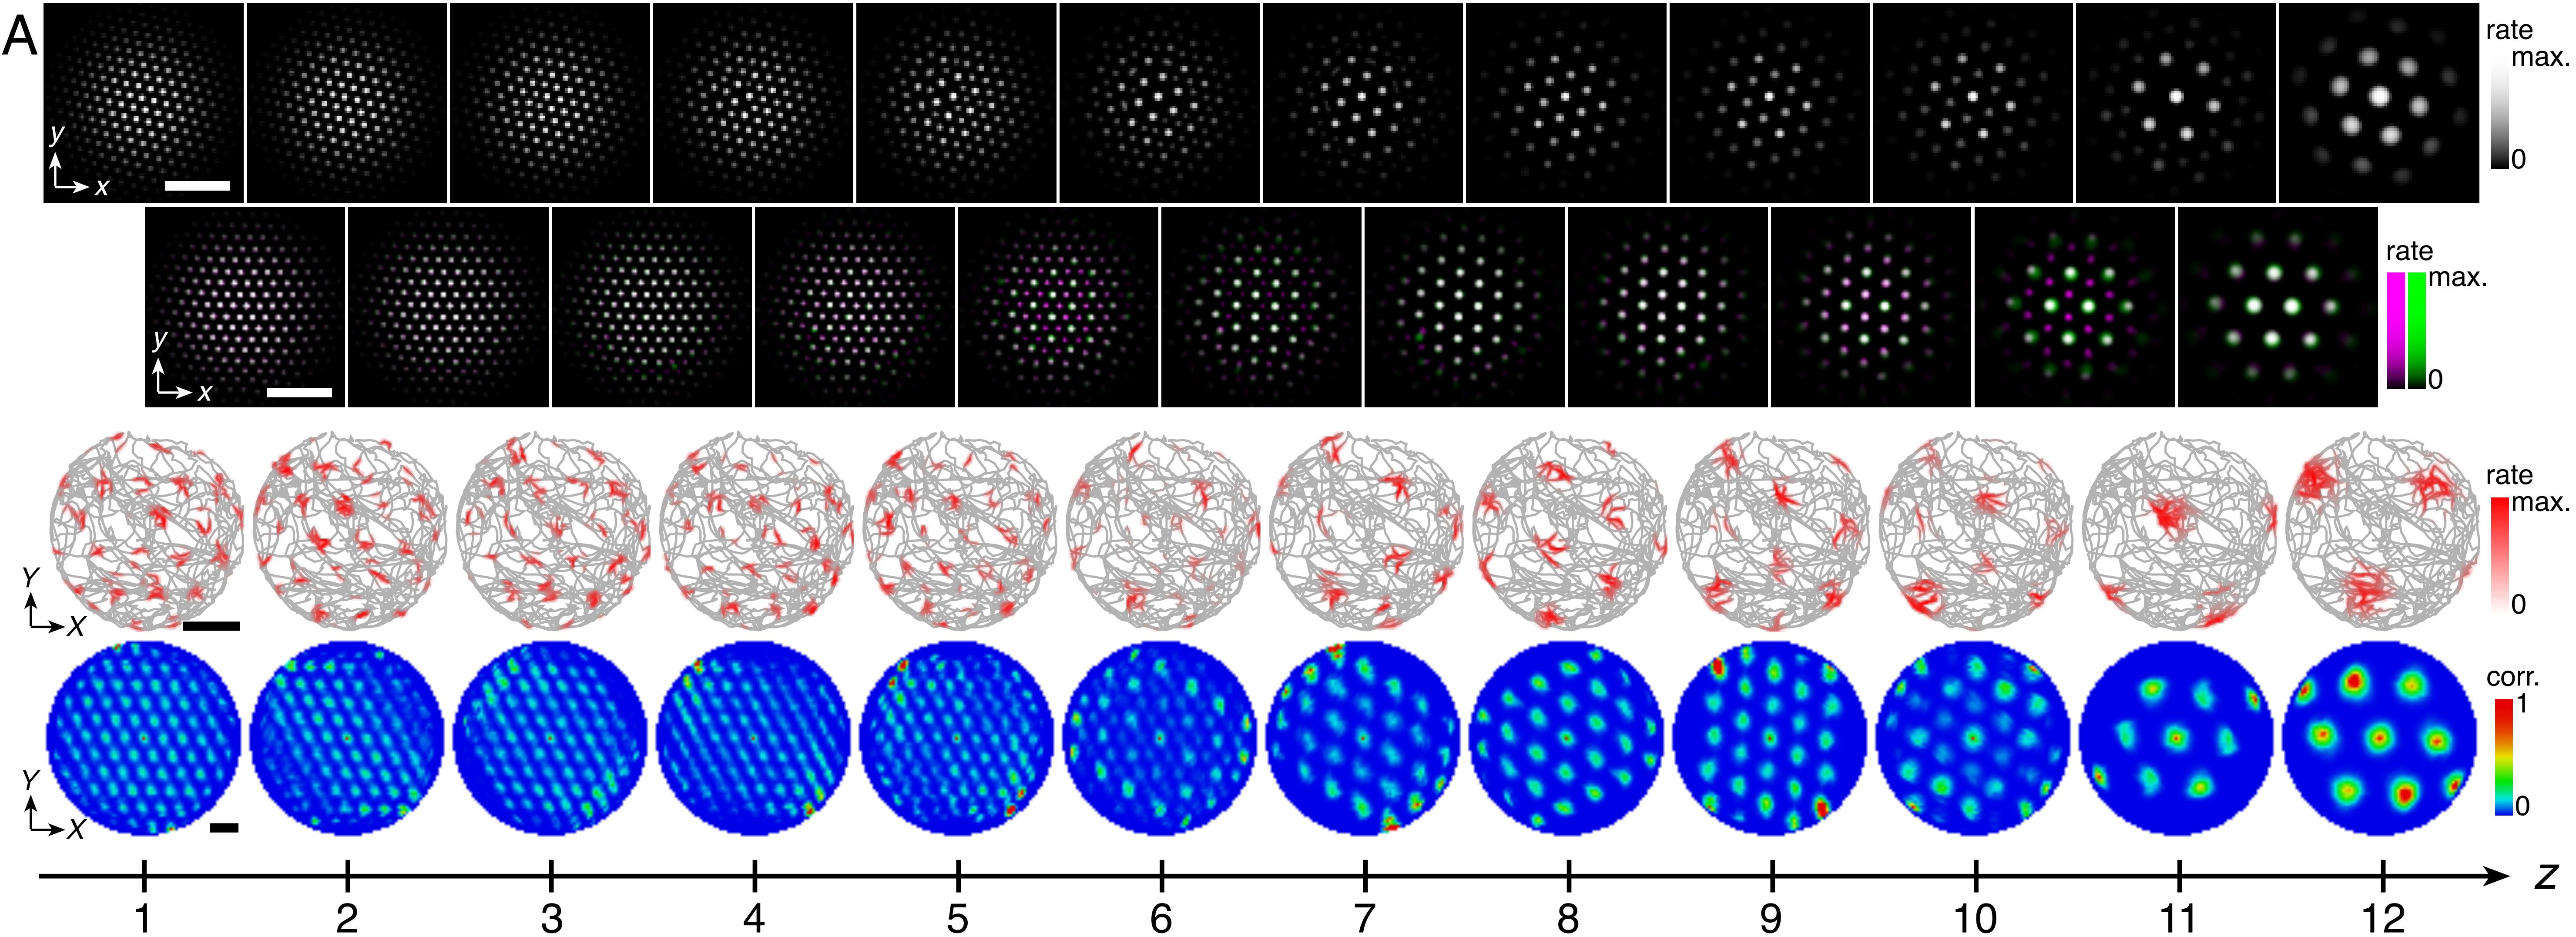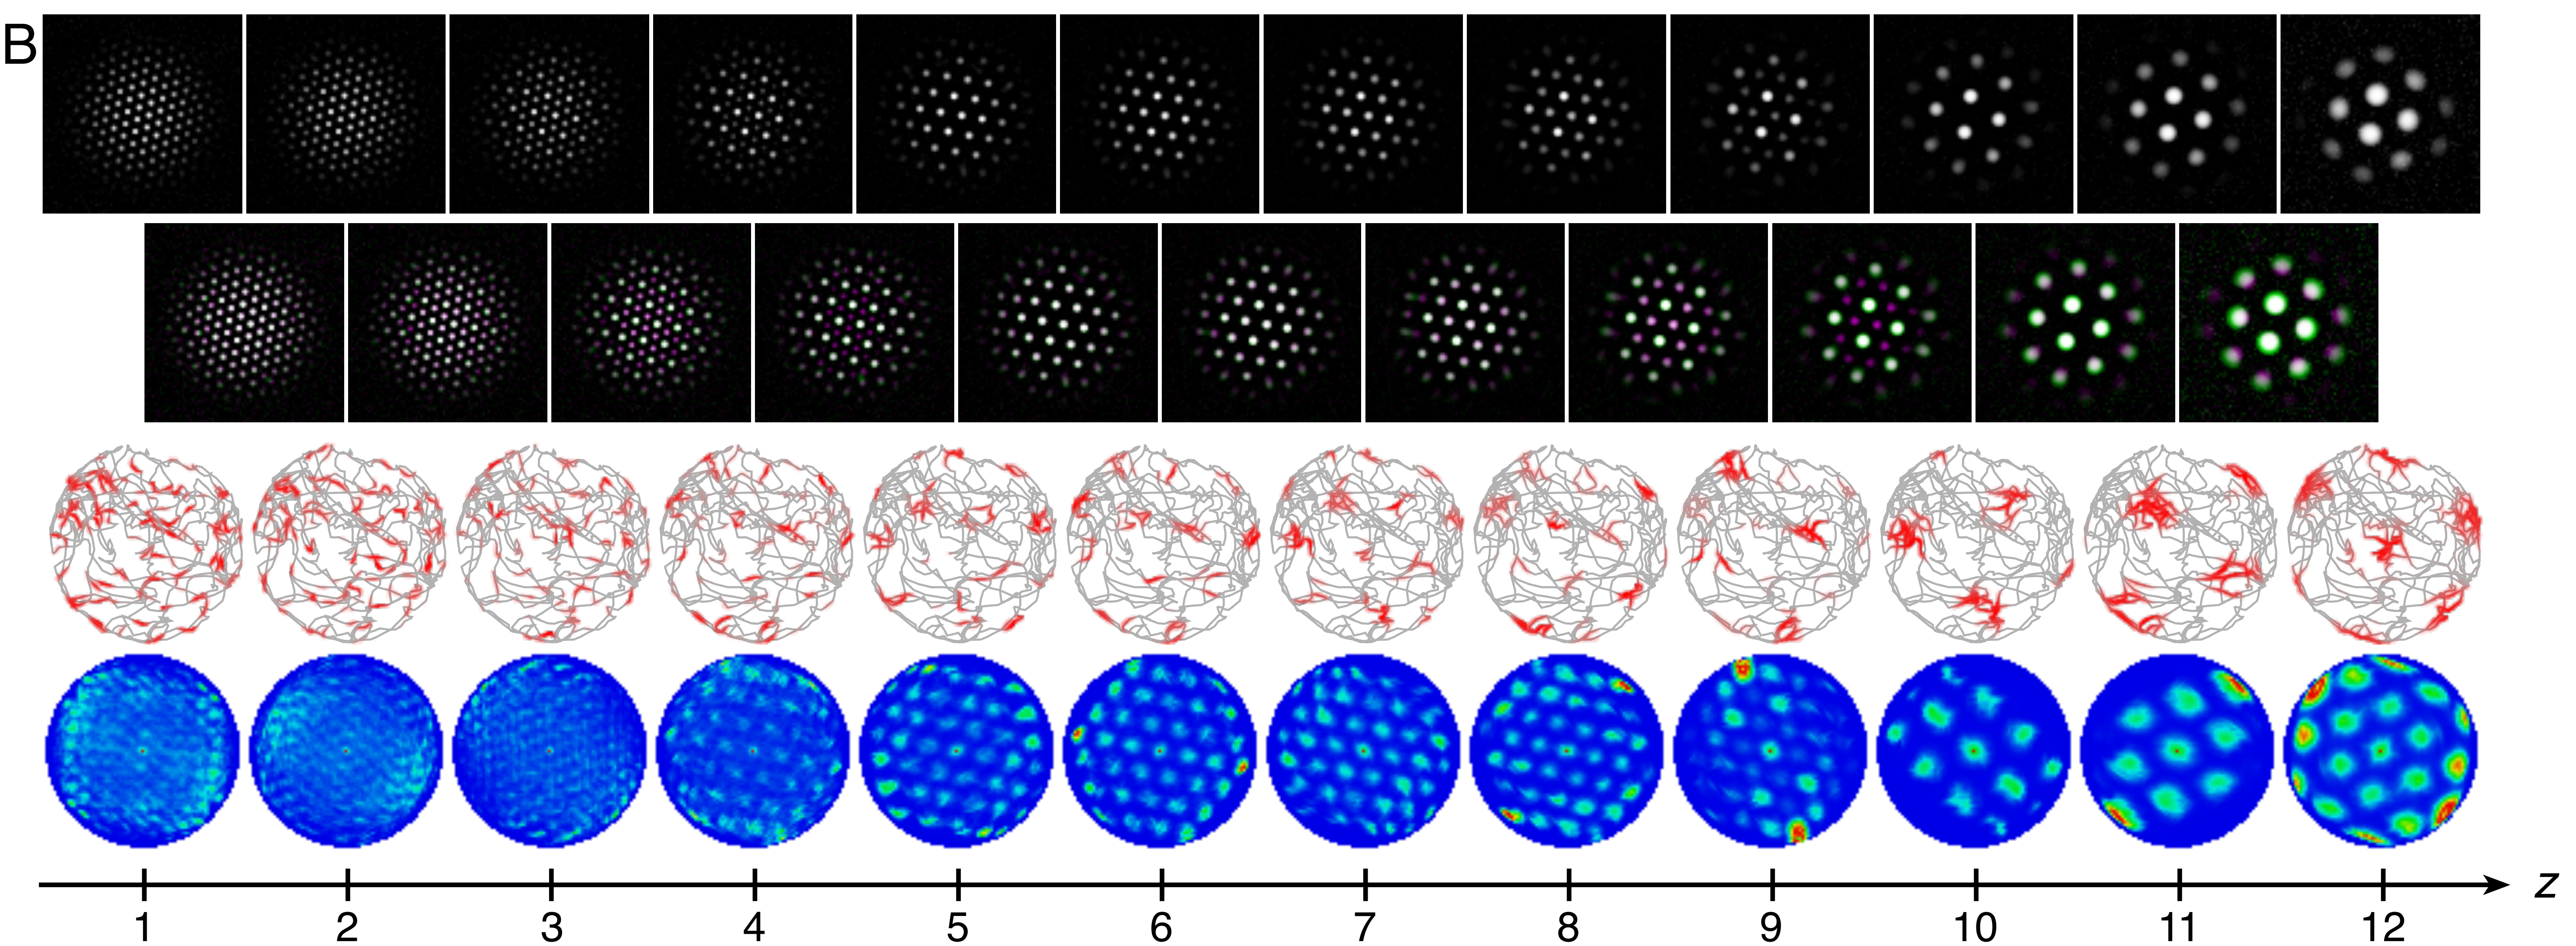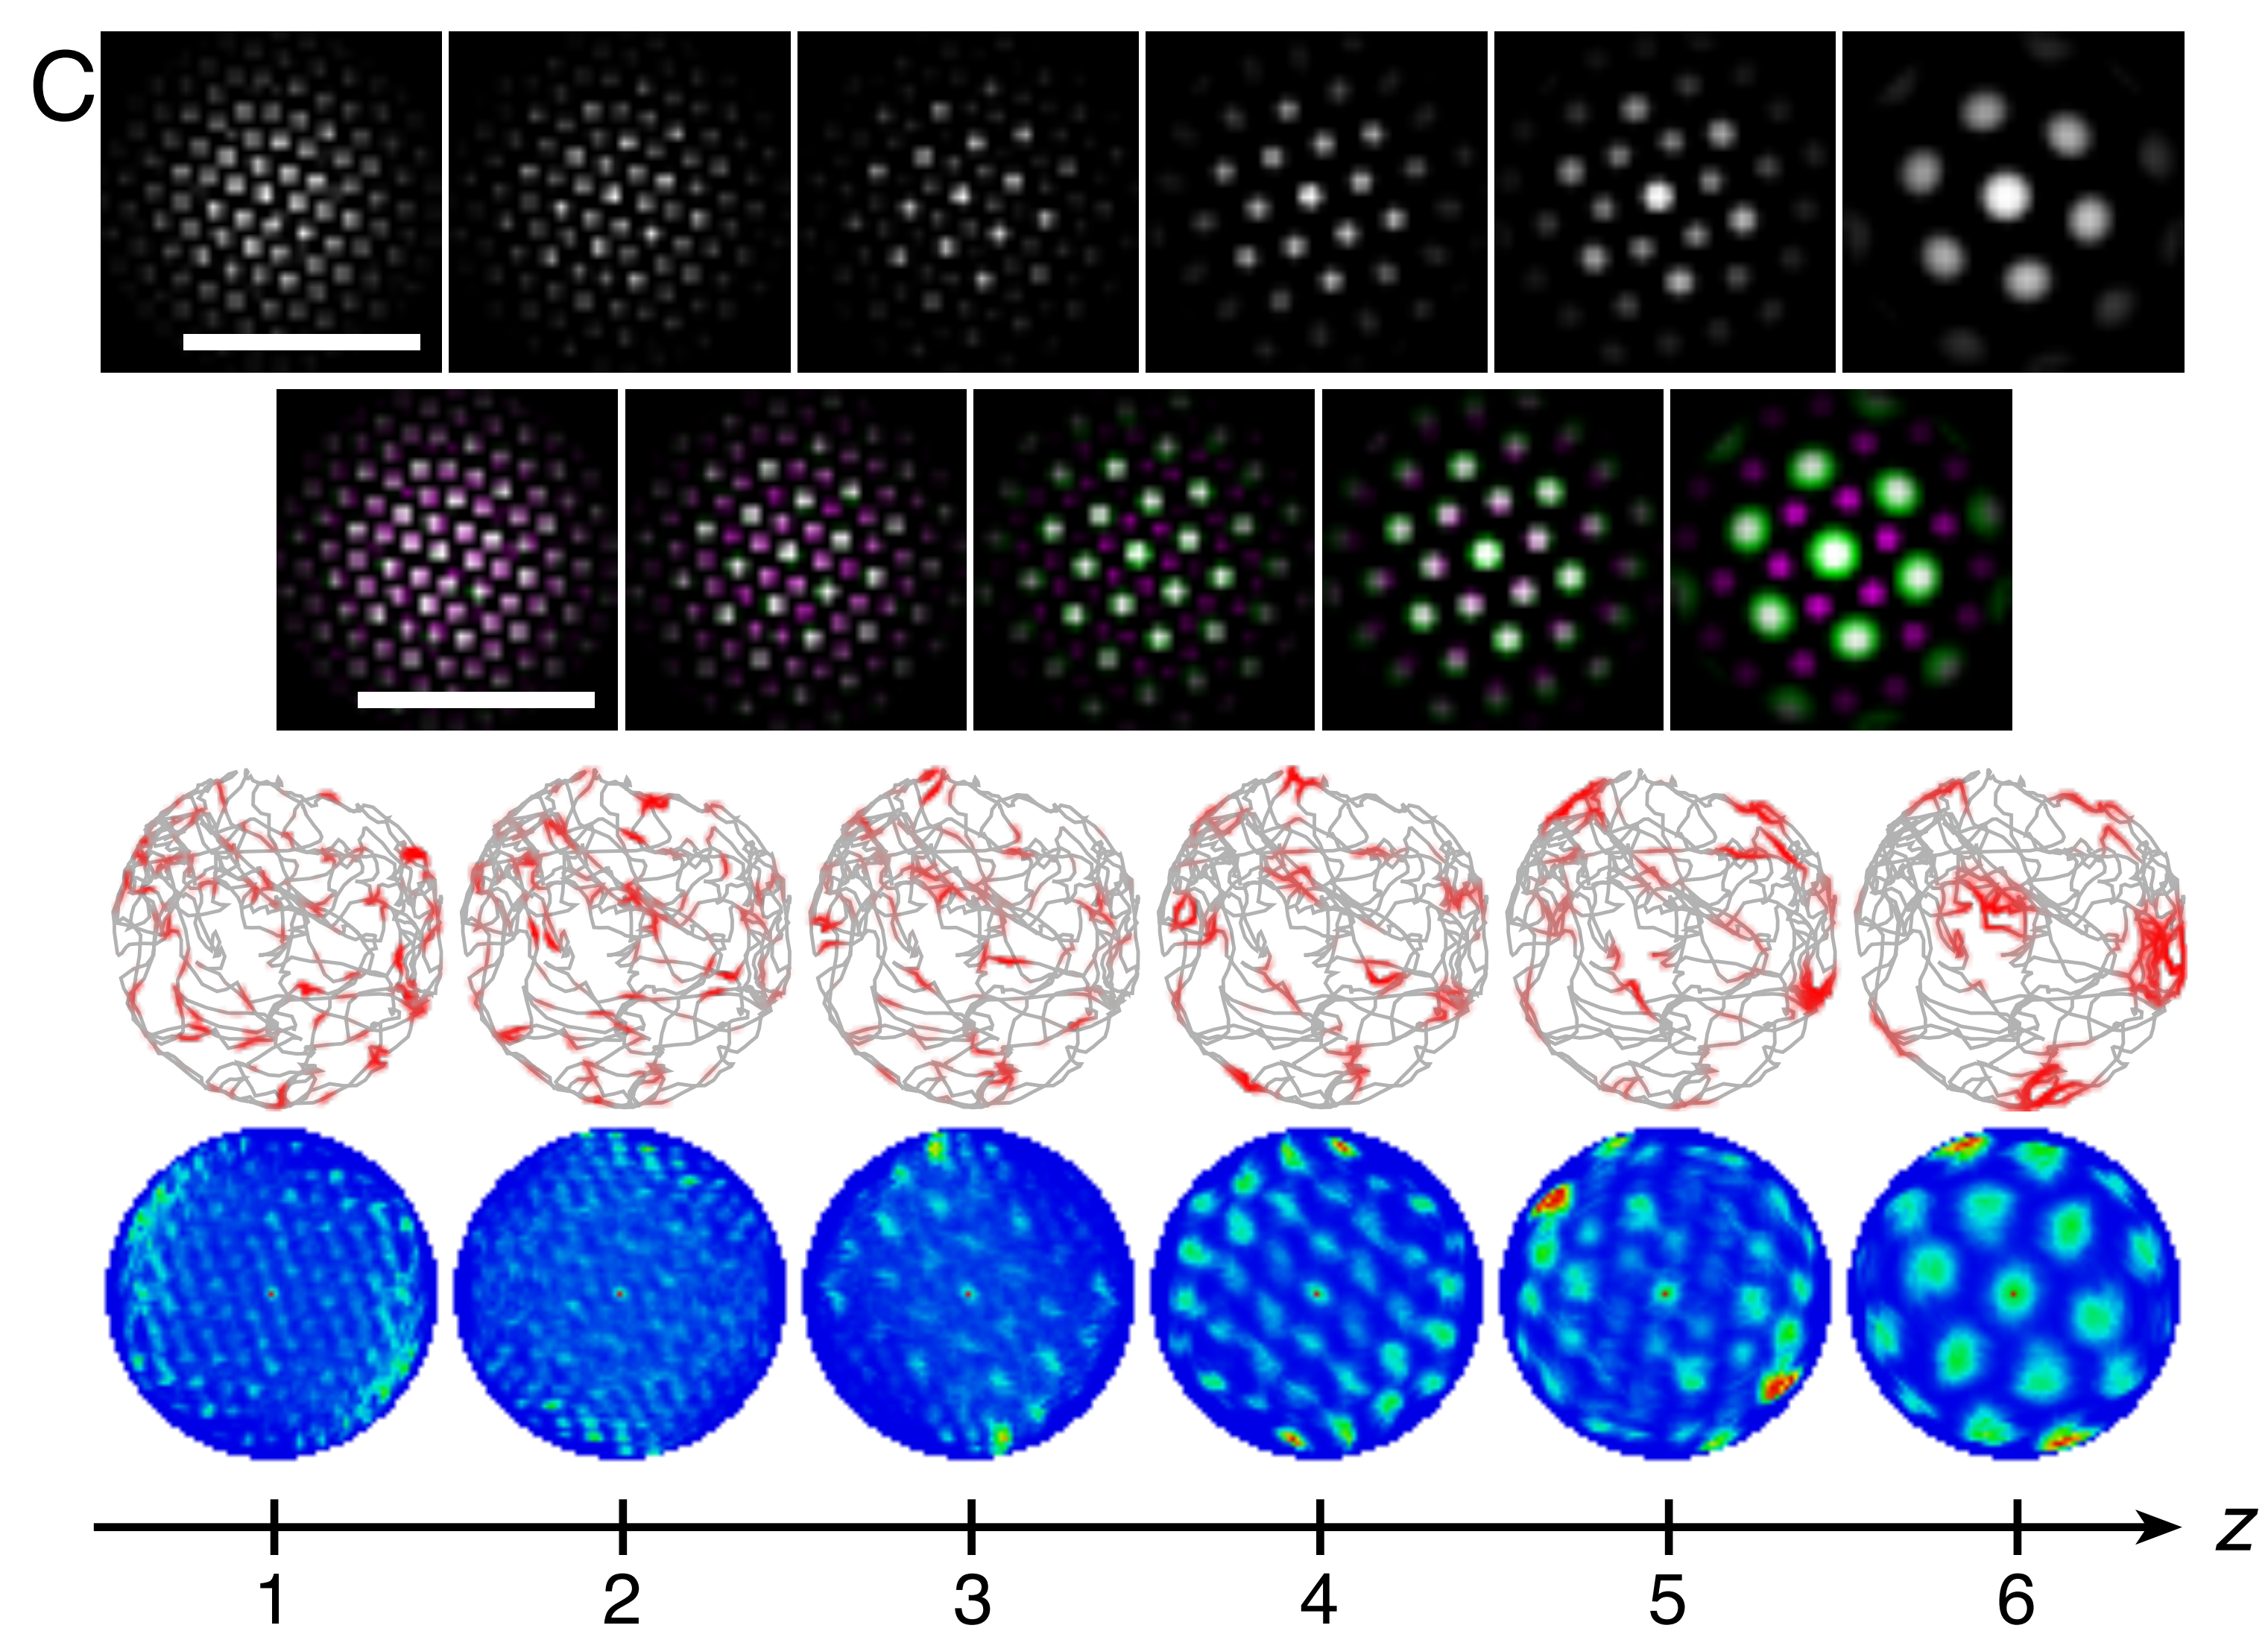

Supplement: supp [file elife-46687-supp-v1.zip › elife_poa_e46687_Figure_4_figure_supplement_2.pdf]

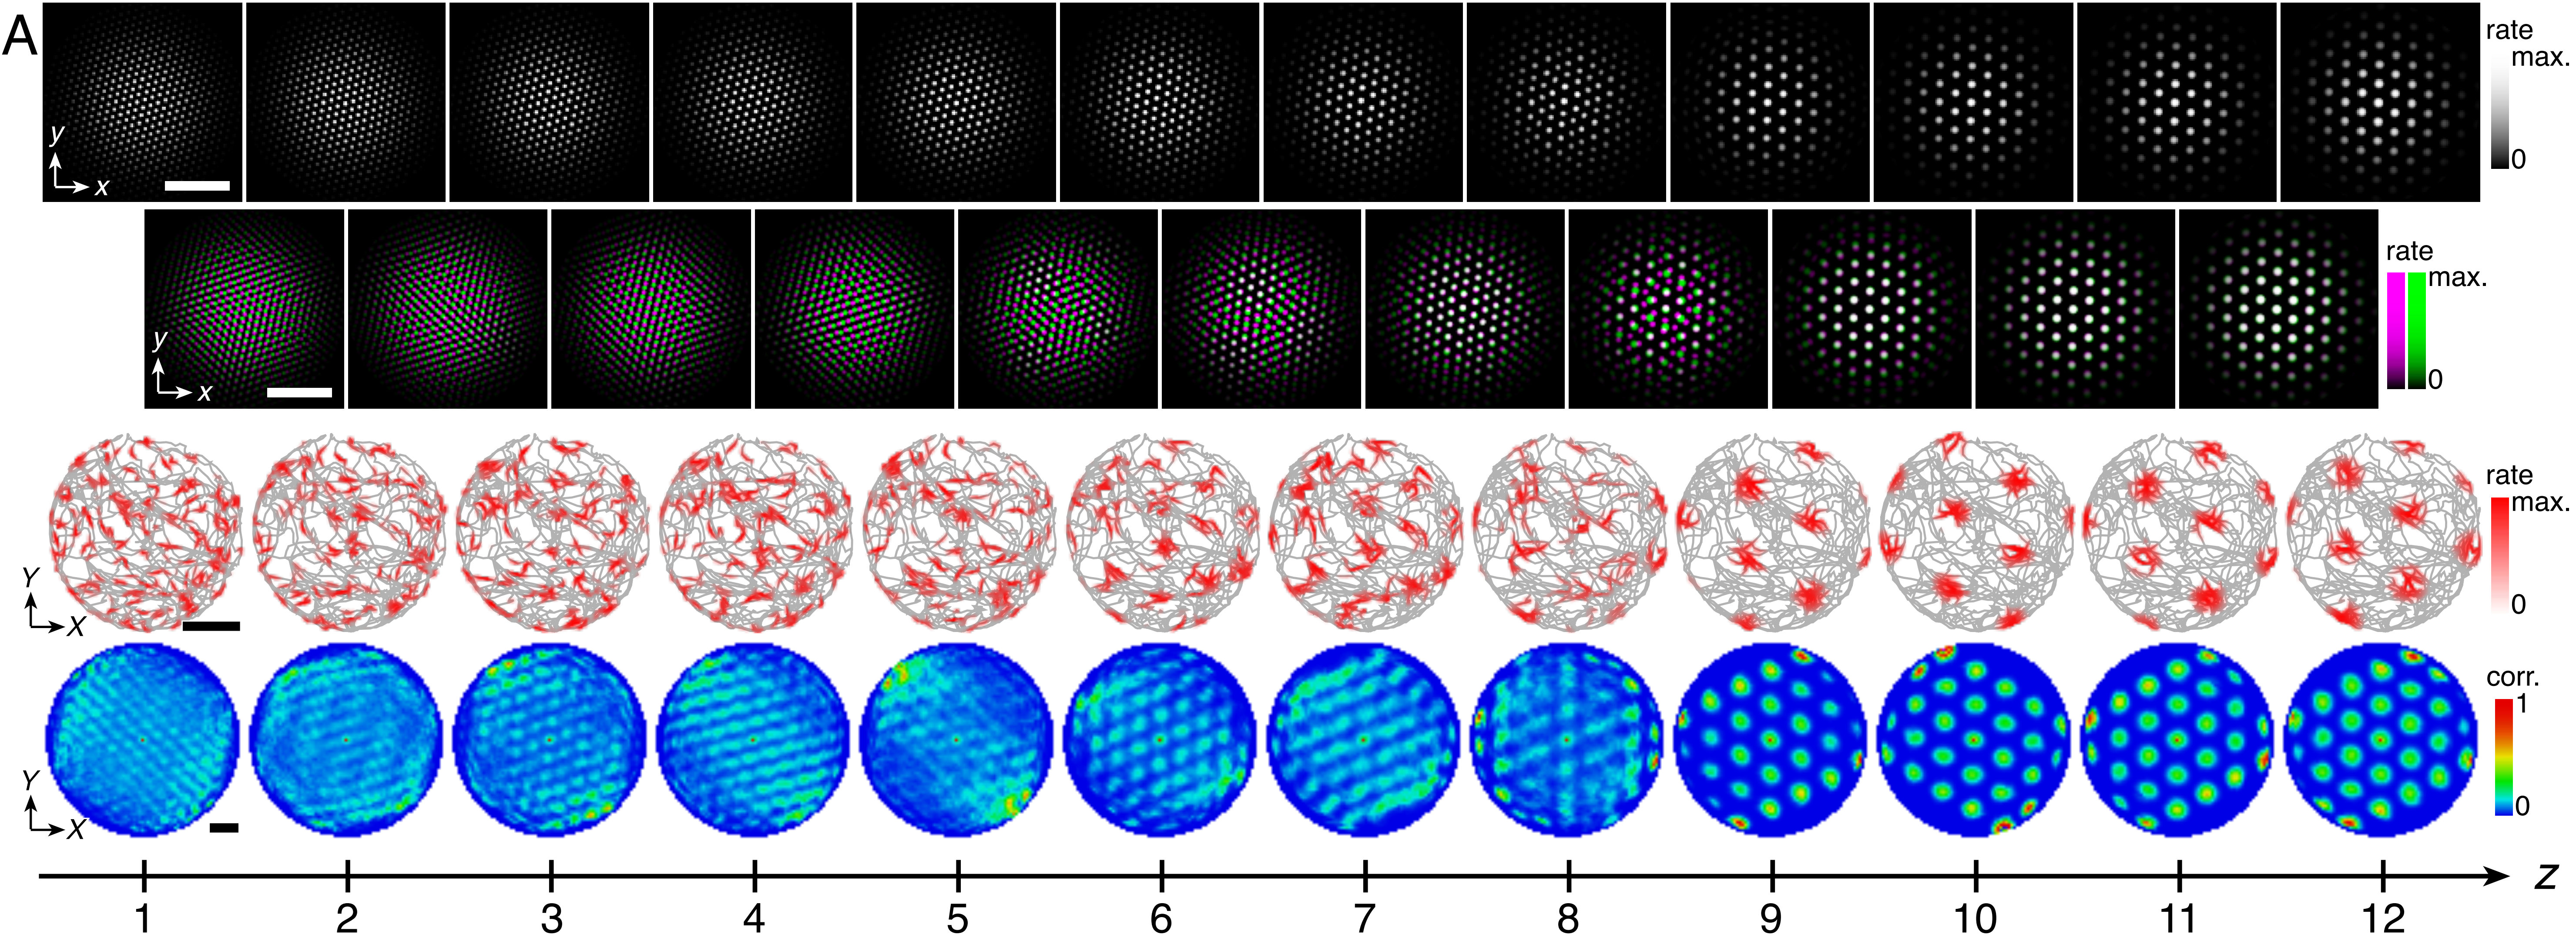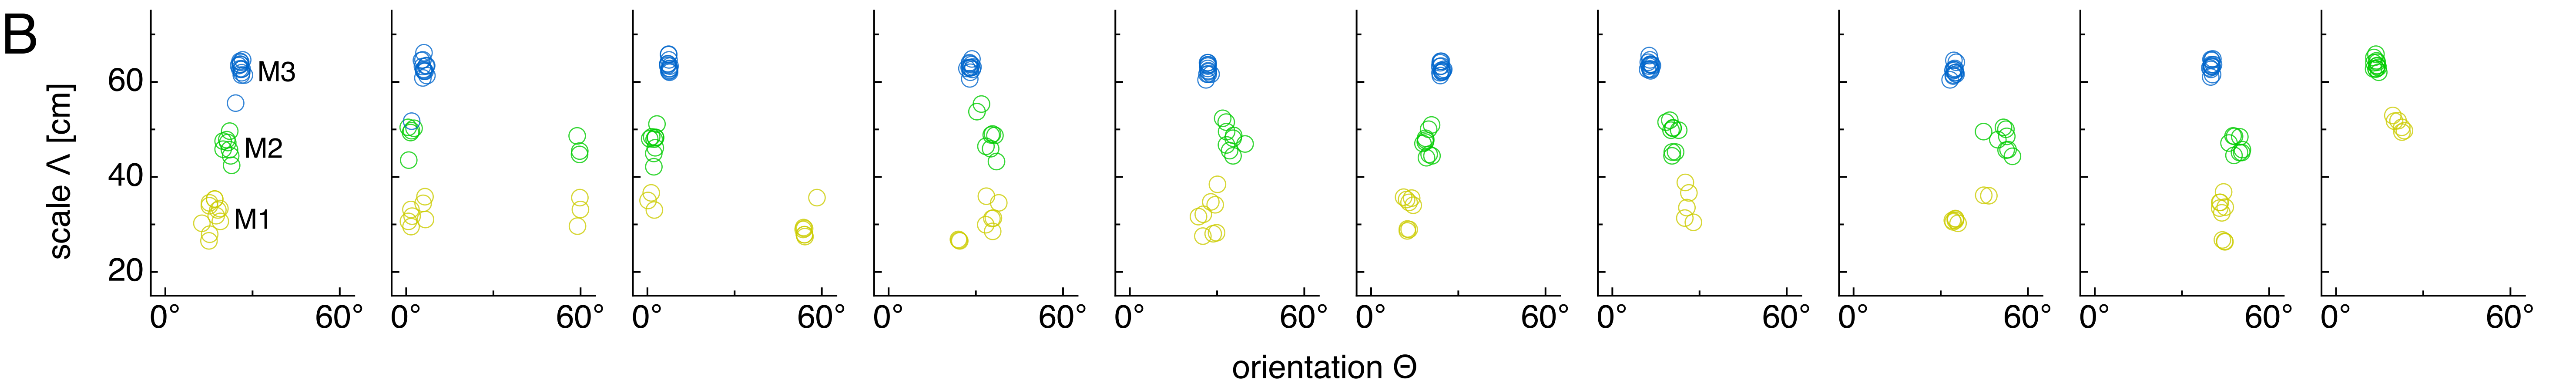

Supplement: supp [file elife-46687-supp-v1.zip › elife_poa_e46687_Figure_6_figure_supplement_1.pdf]

$$d = 6, u_{\text{mag}} = 1.6, l(2)/l(1) = 1.6$$

**A**
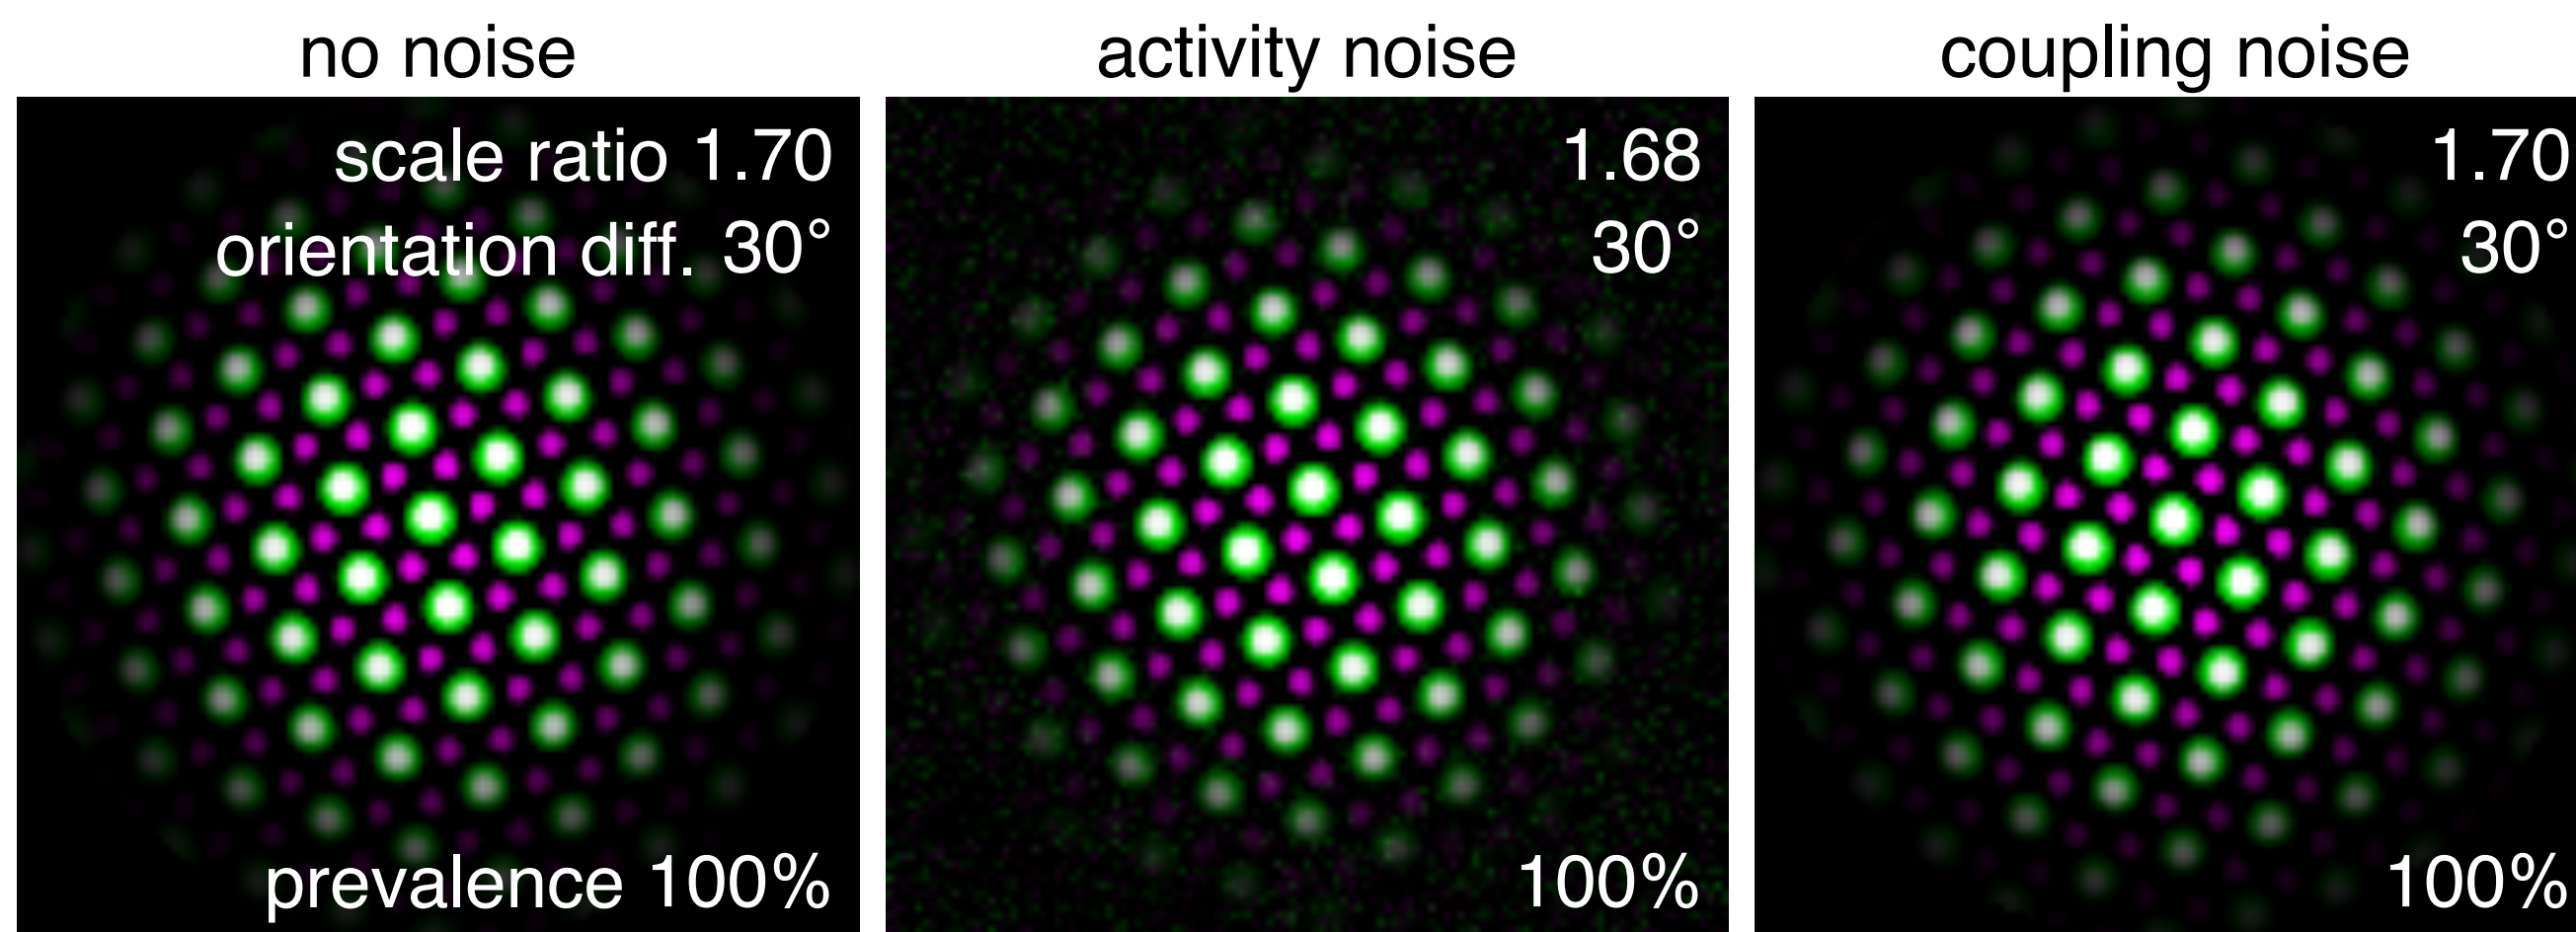
**B**
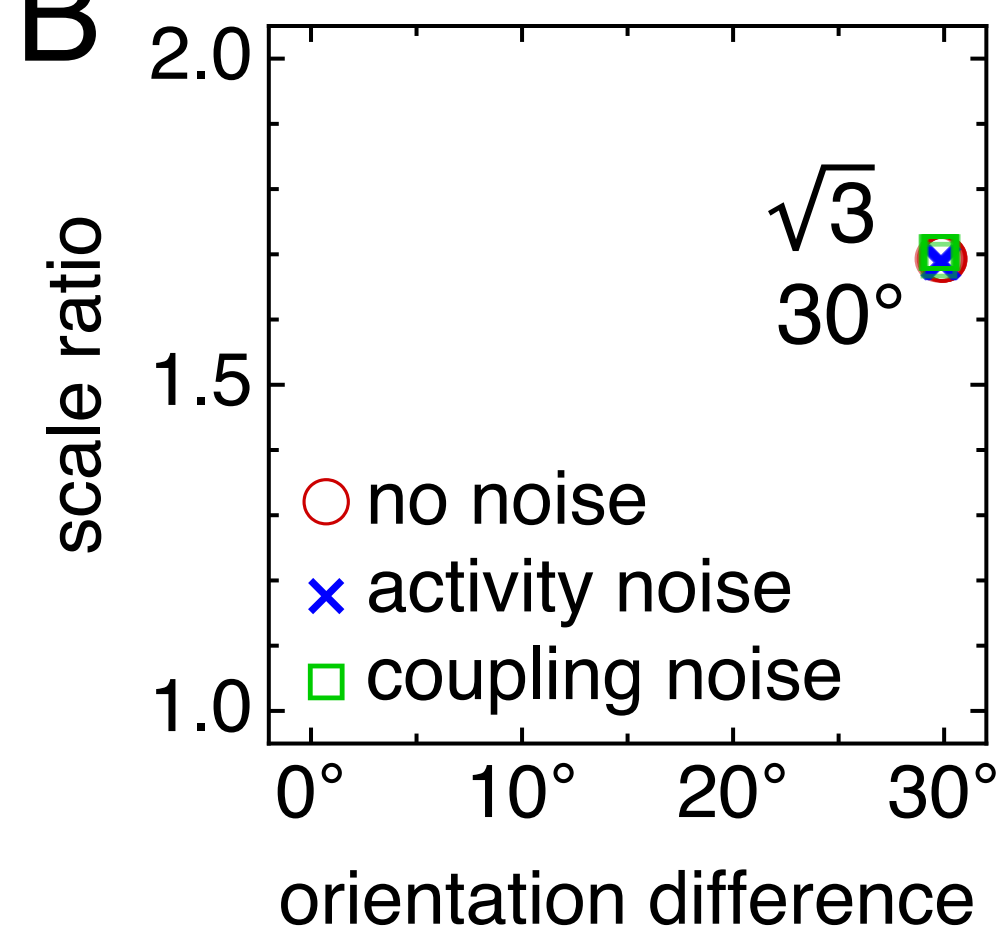

$$d = 6, u_{\text{mag}} = 0.8, l(2)/l(1) = 1.4$$

**C**
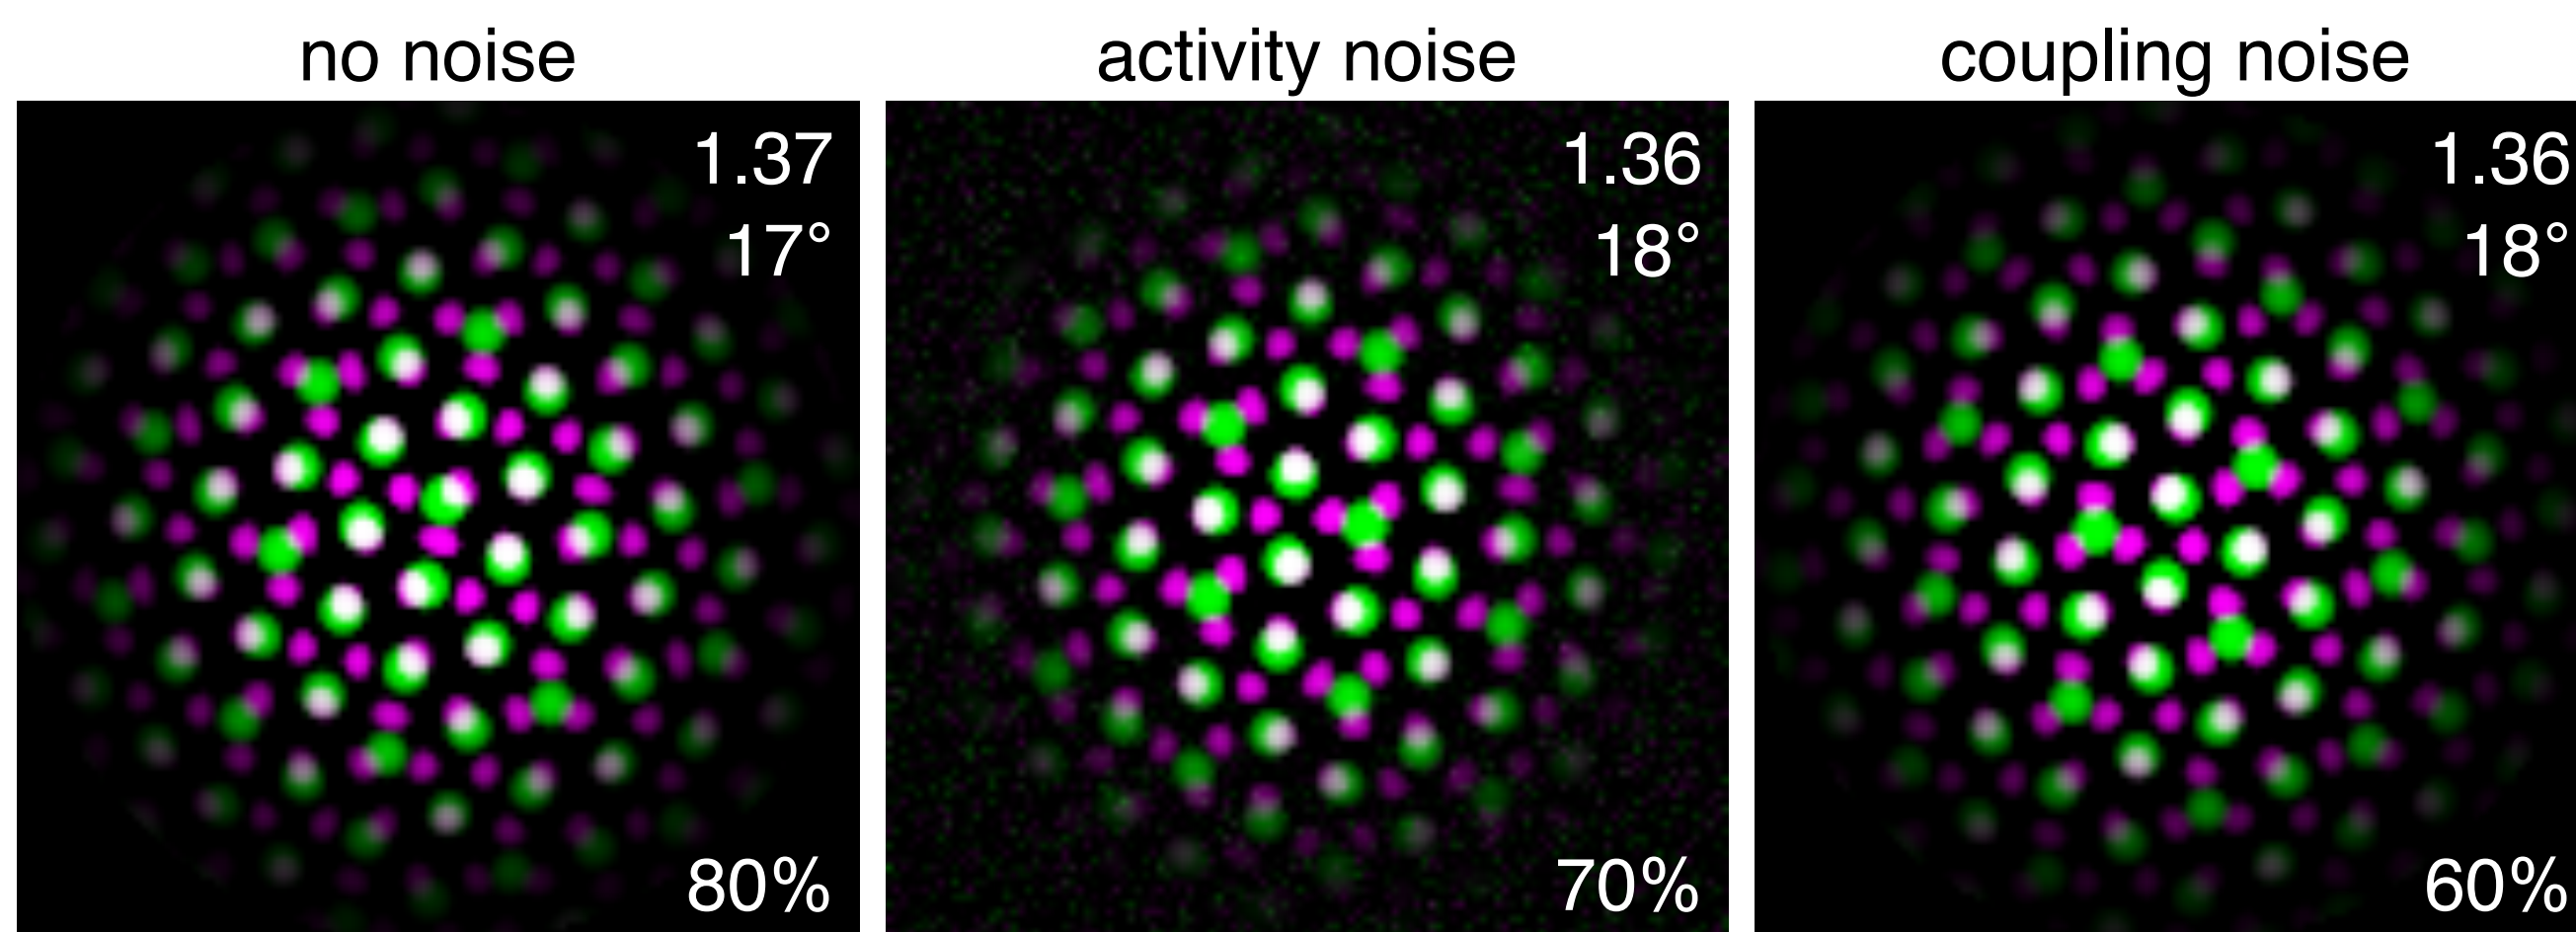
**D**
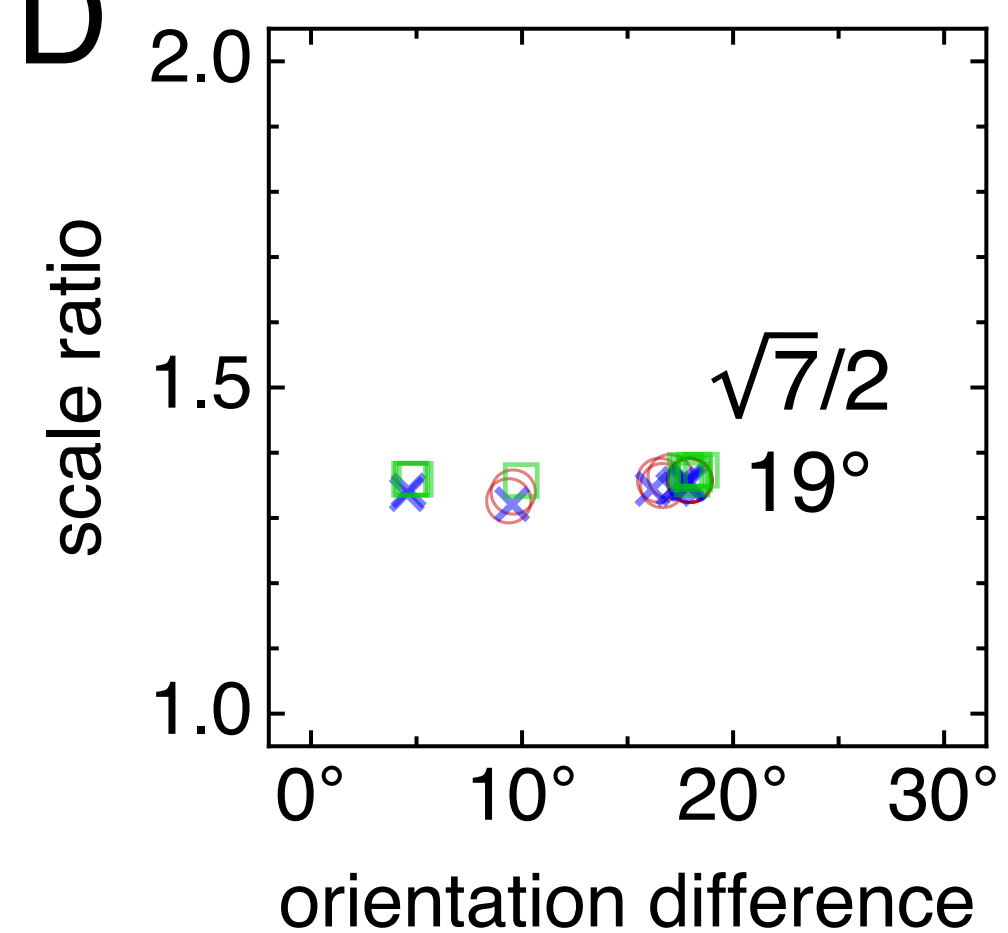

$$d = 12, u_{\text{mag}} = 1.2, l(2)/l(1) = 1.3$$

**E**
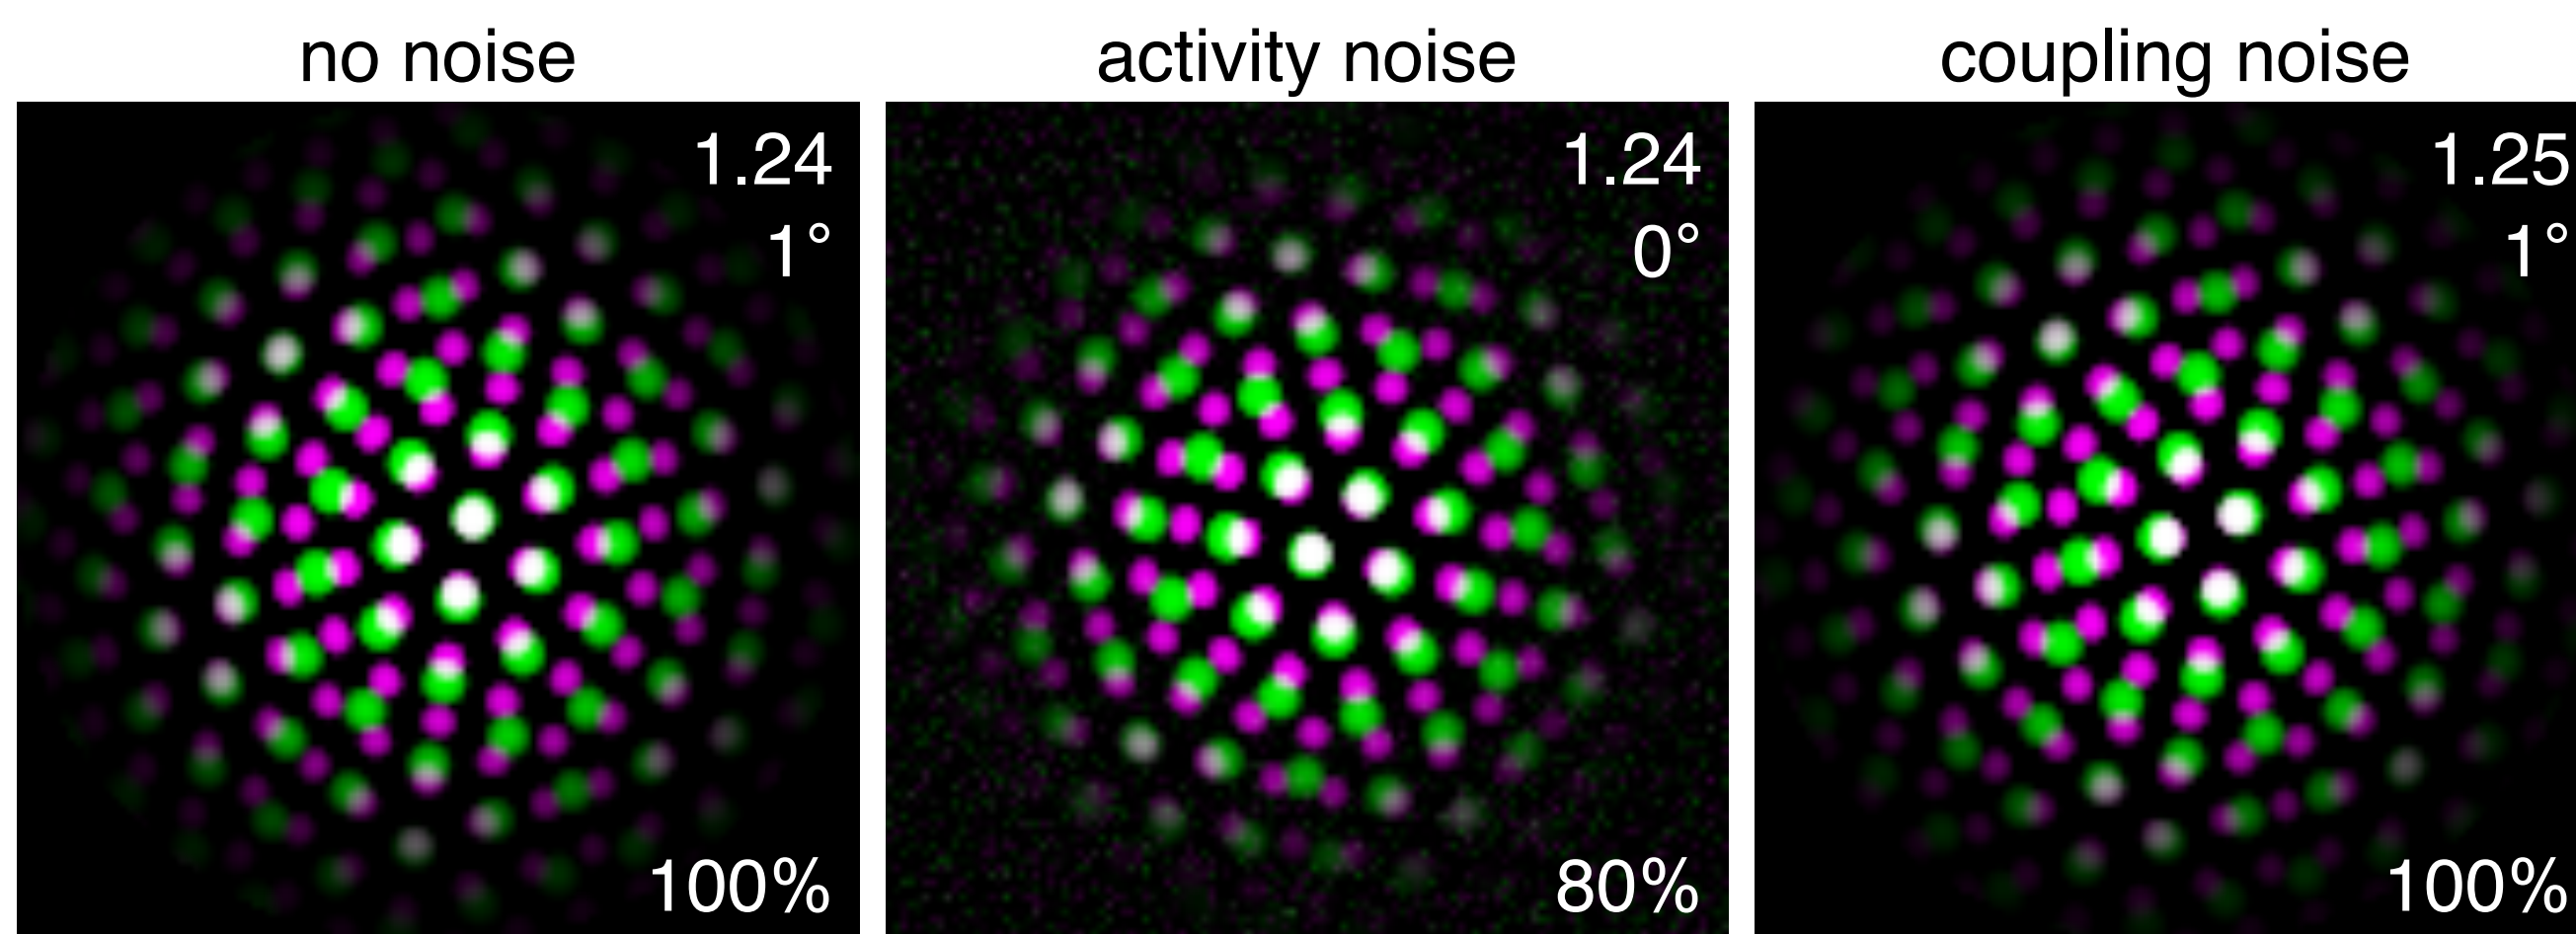
**F**
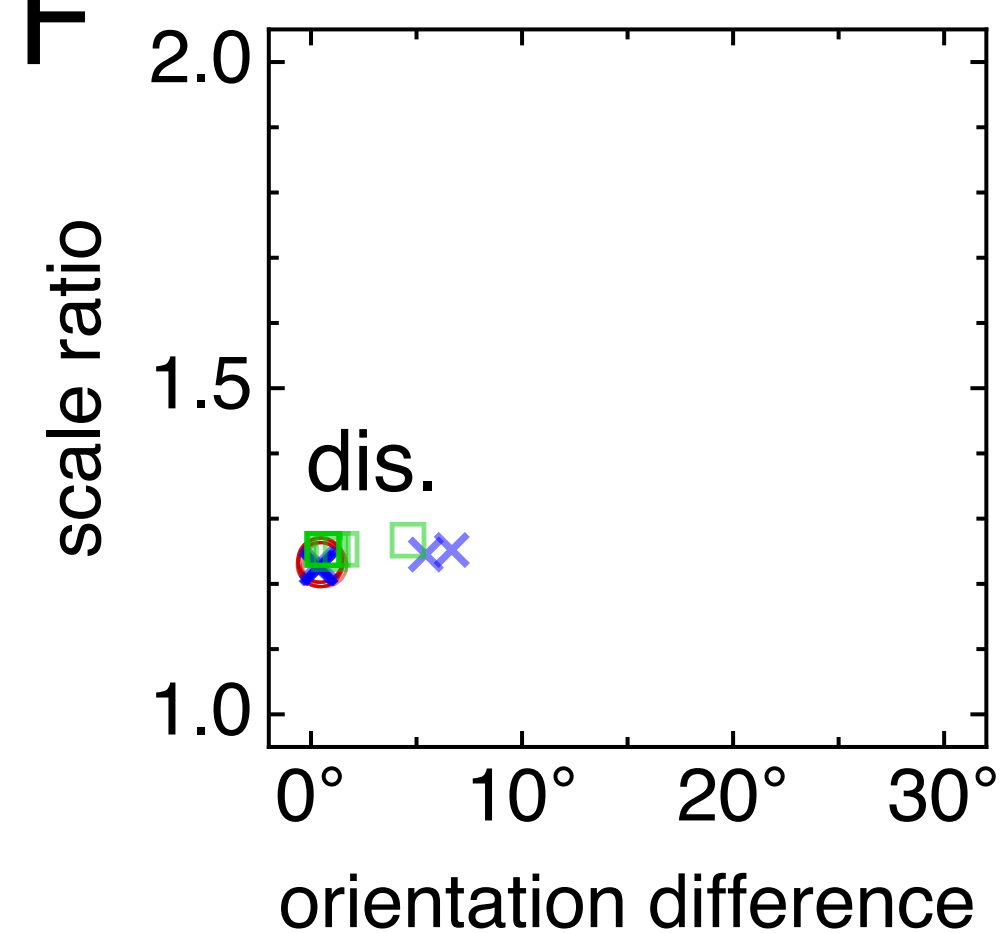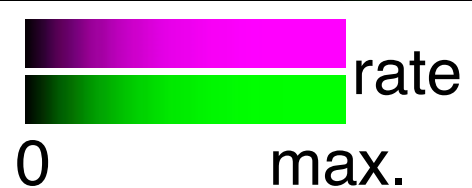

Supplement: supp [file elife-46687-supp-v1.zip › elife_poa_e46687_Figure_5_figure_supplement_3.pdf]

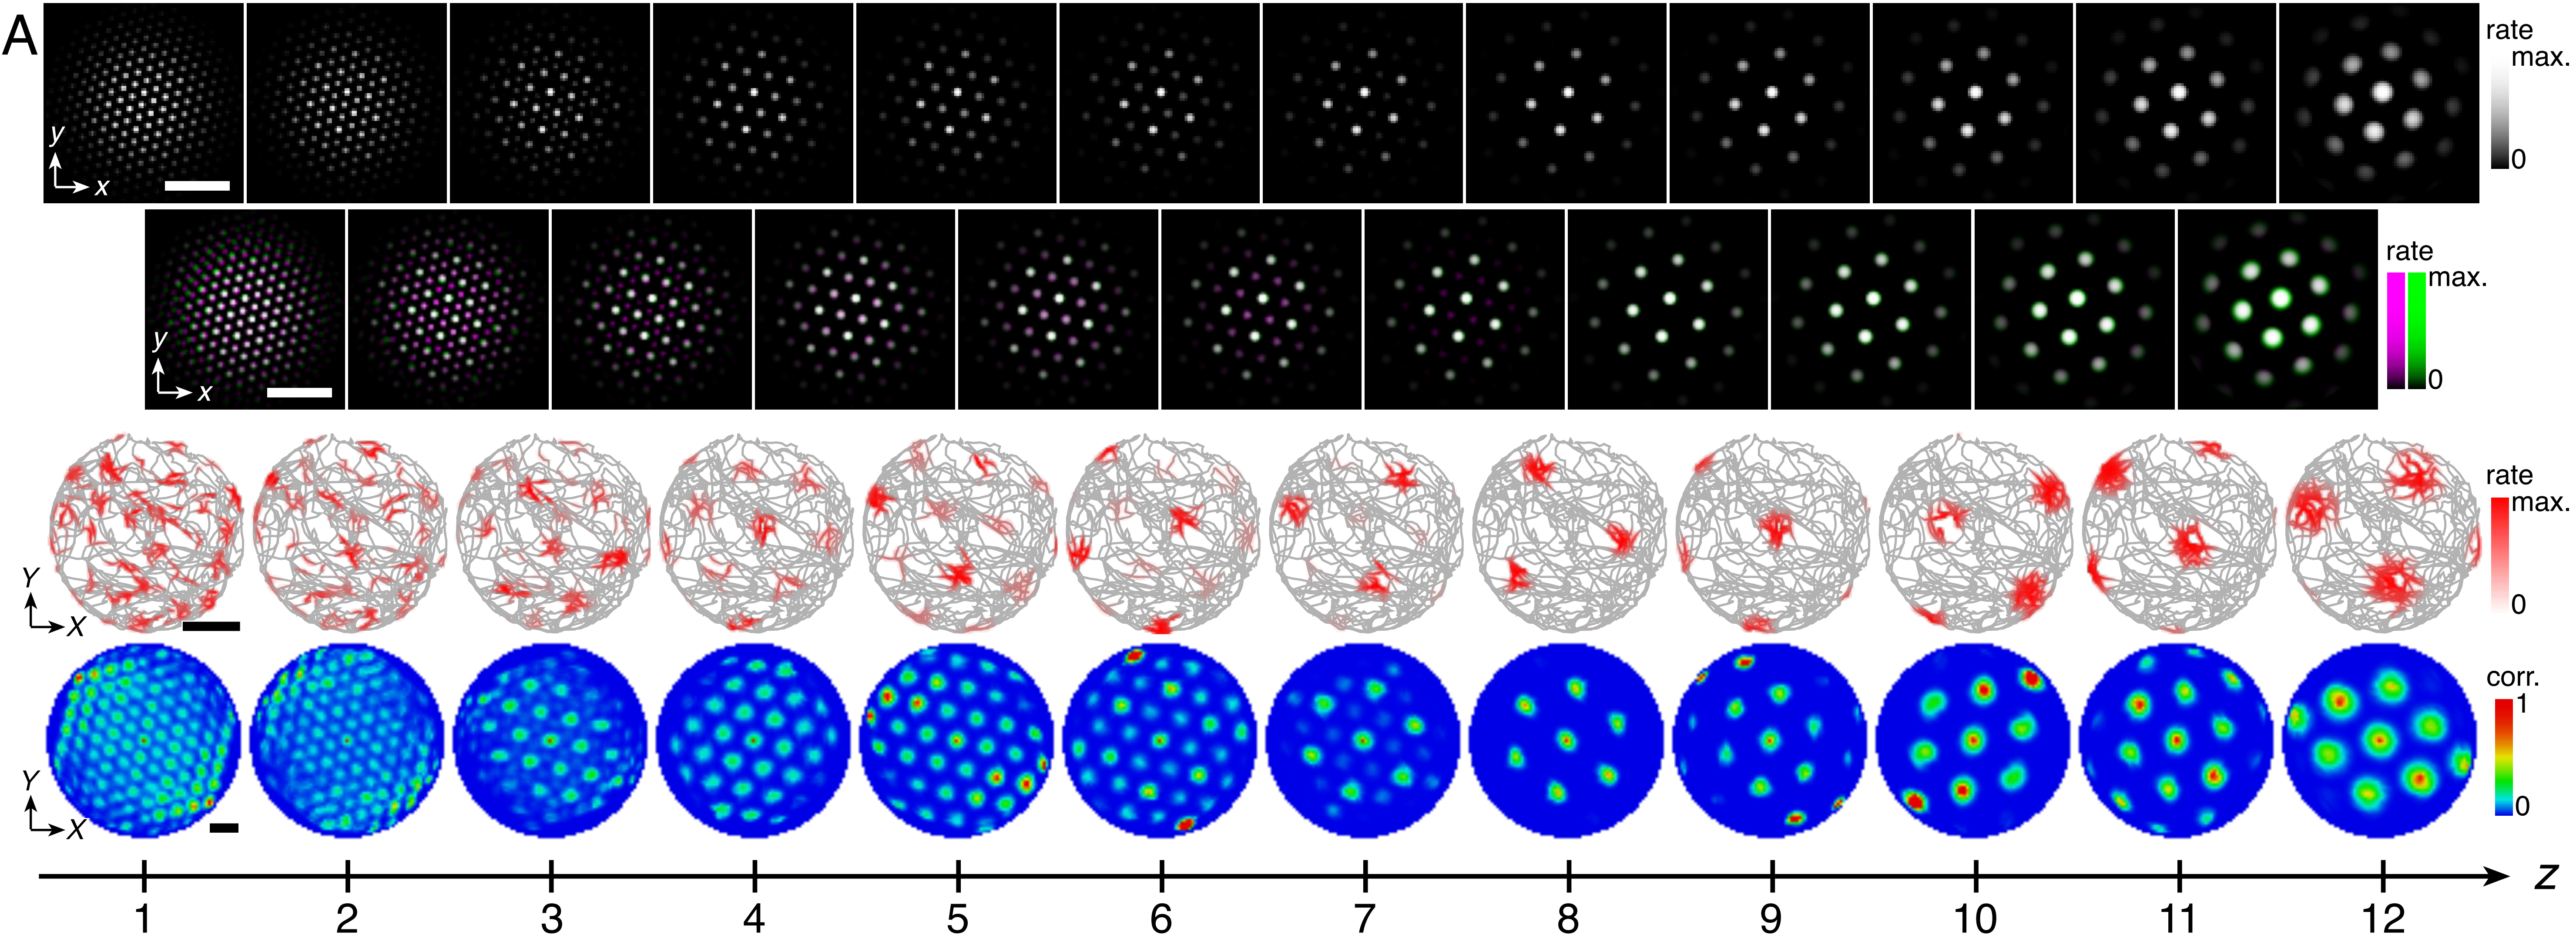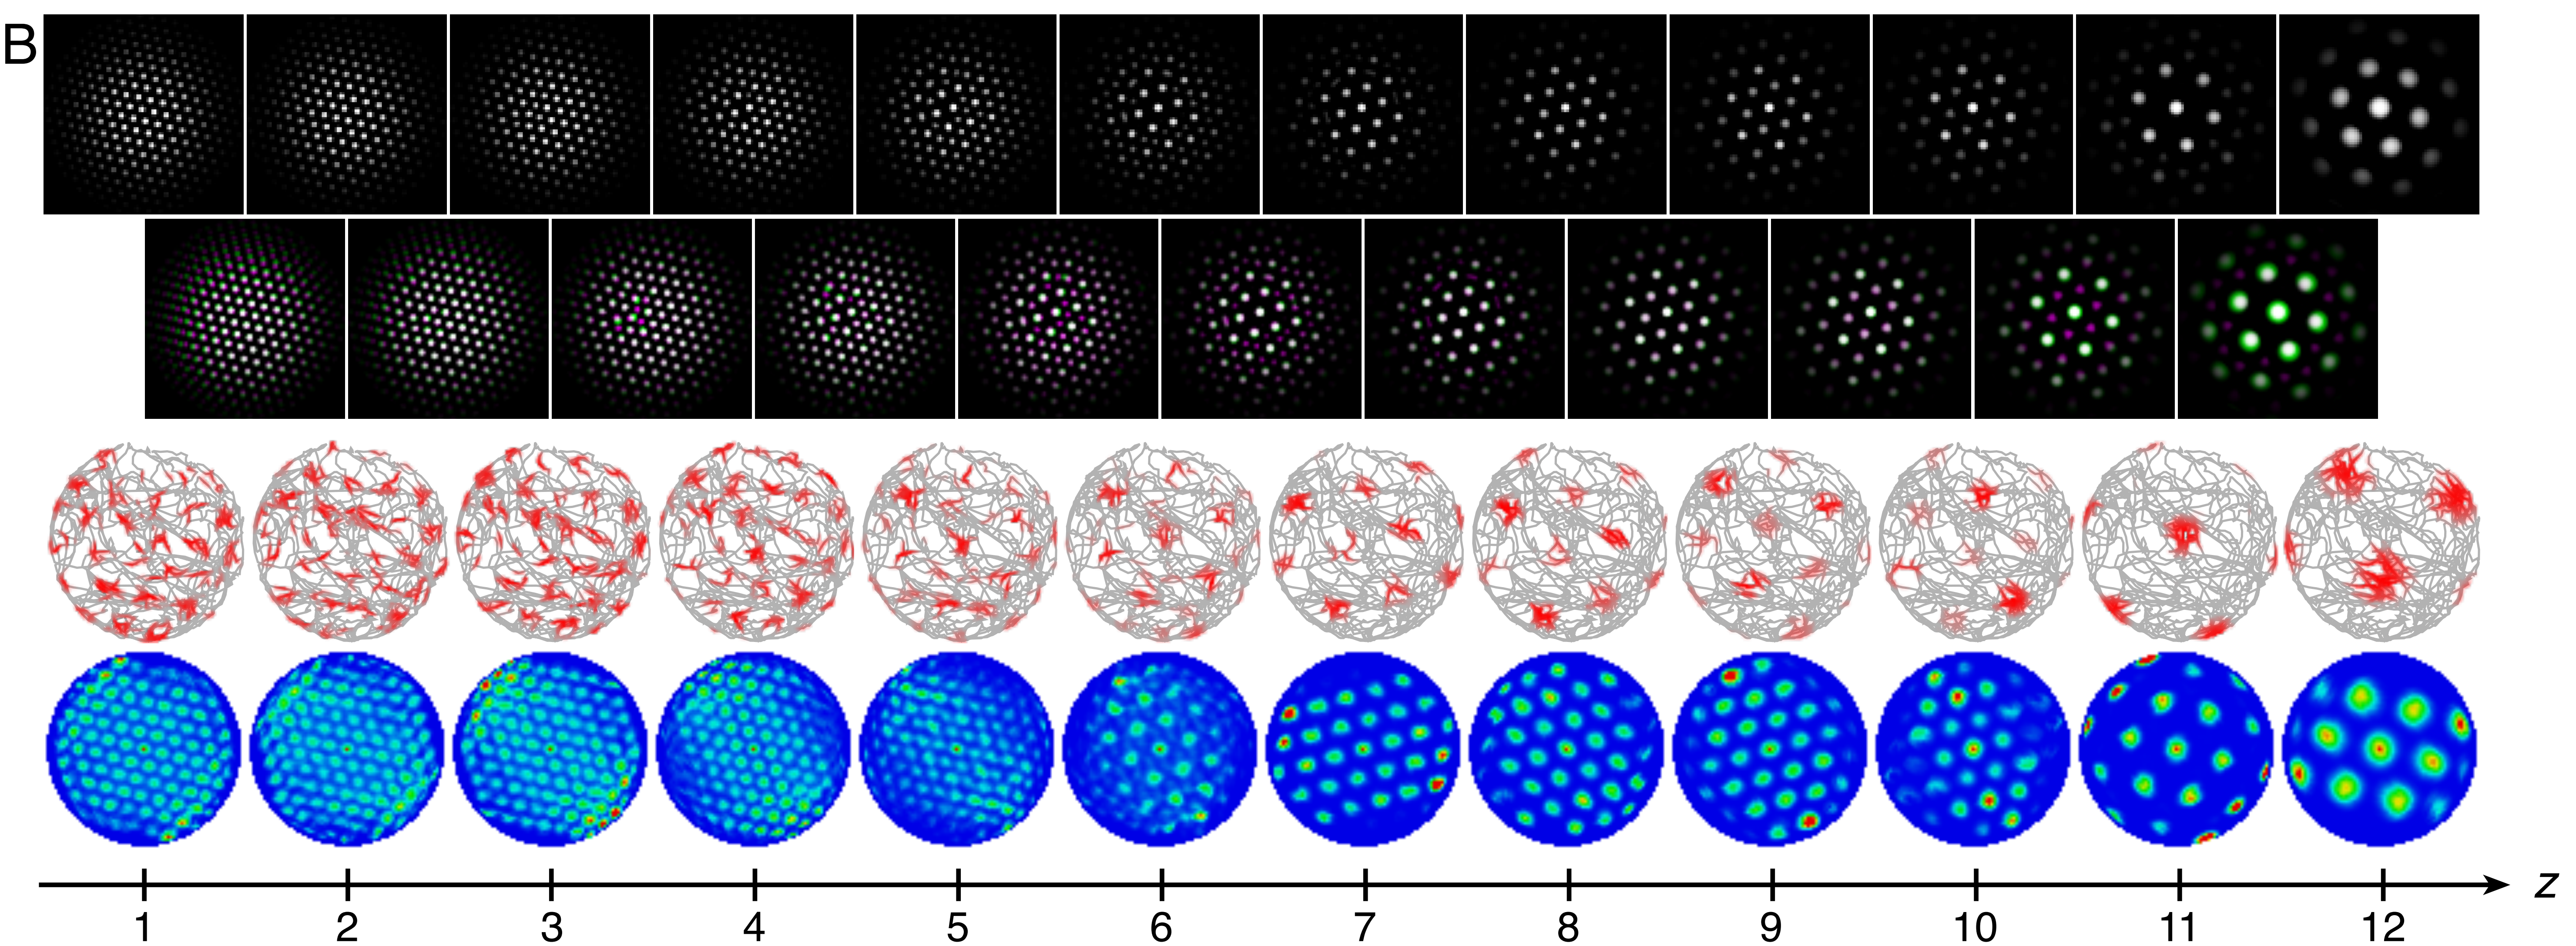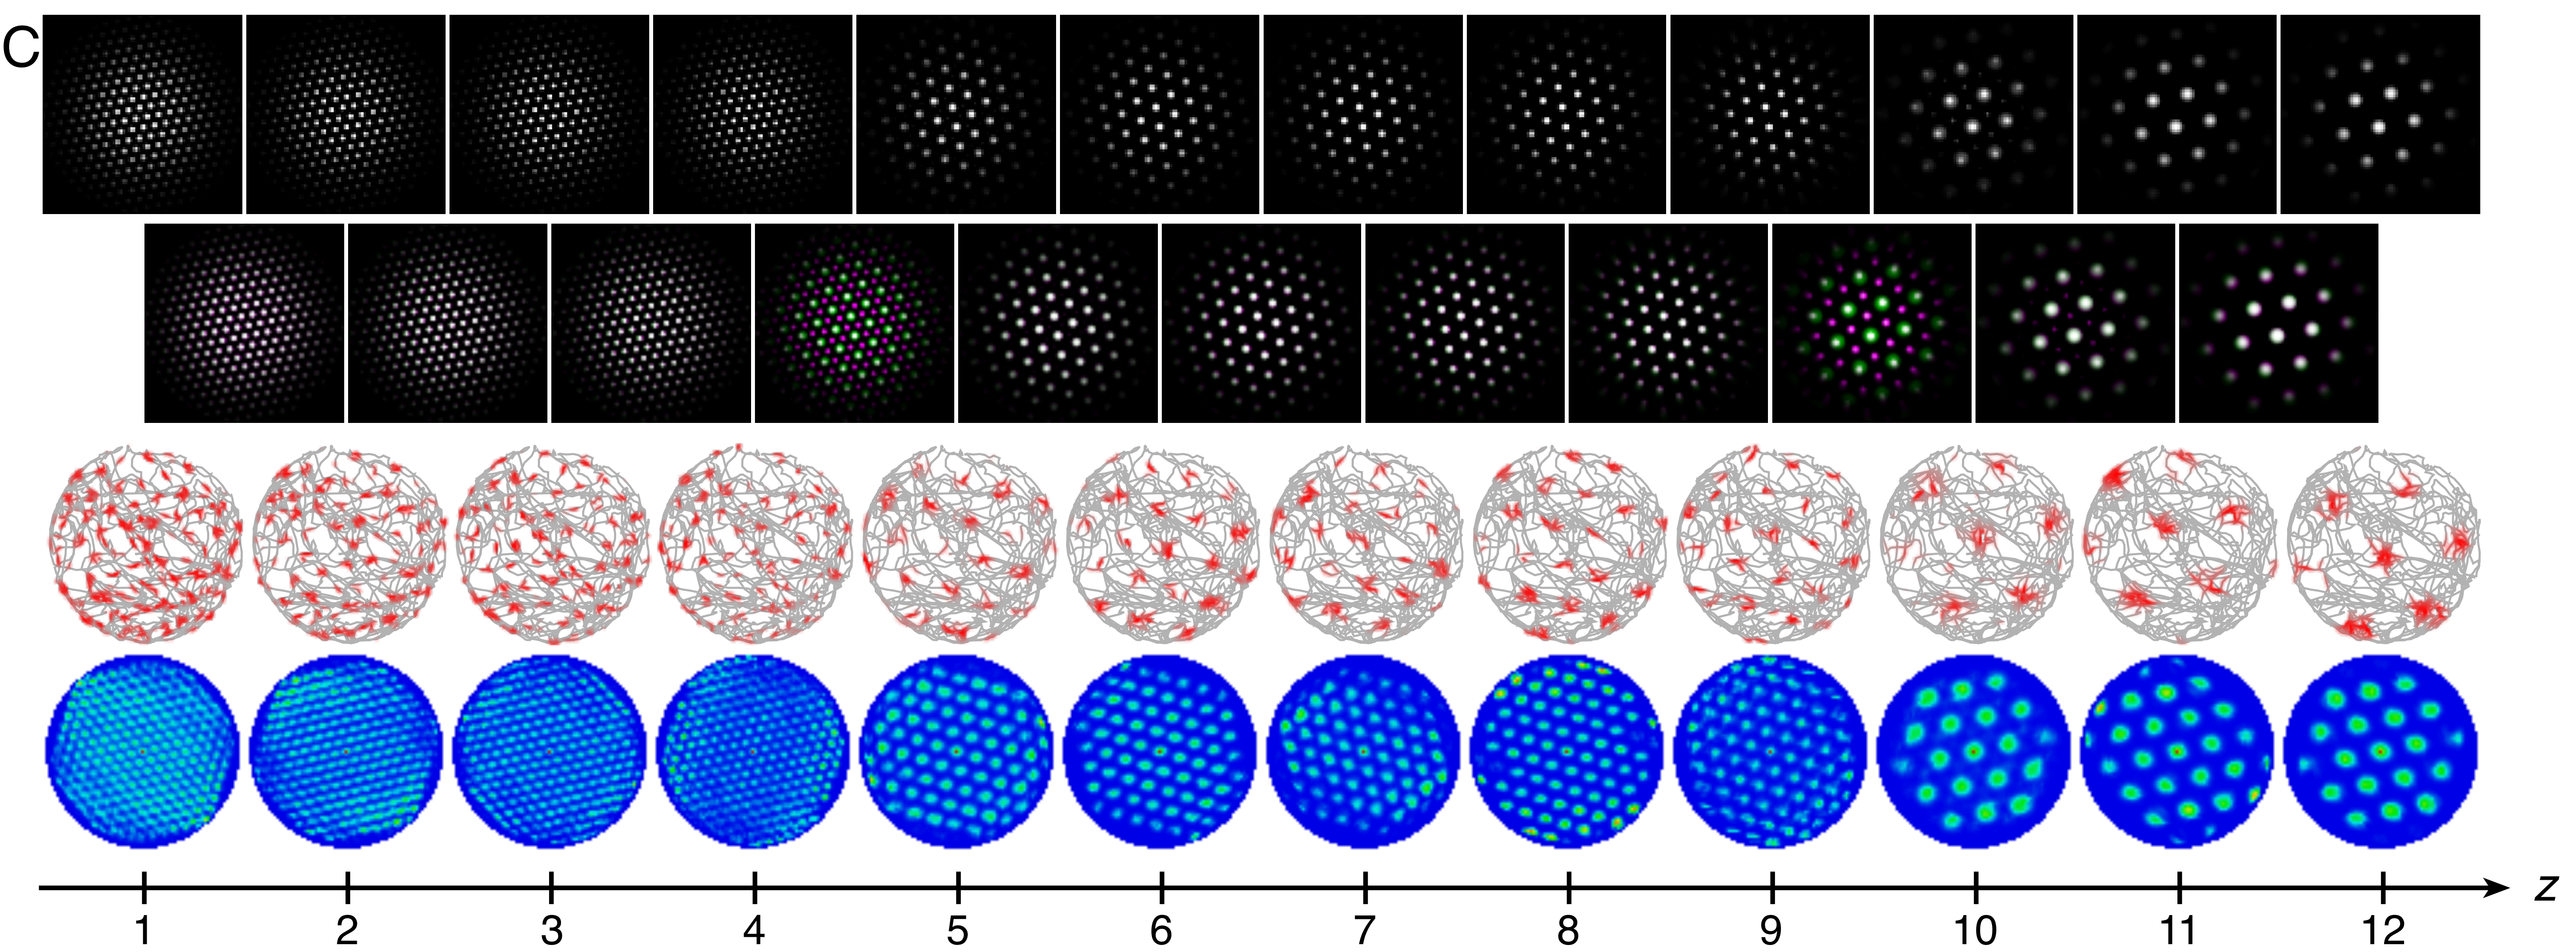

Supplement: supp [file elife-46687-supp-v1.zip › elife_poa_e46687_Figure_4_figure_supplement_1.pdf]

**A** Dunn et al. (2017)

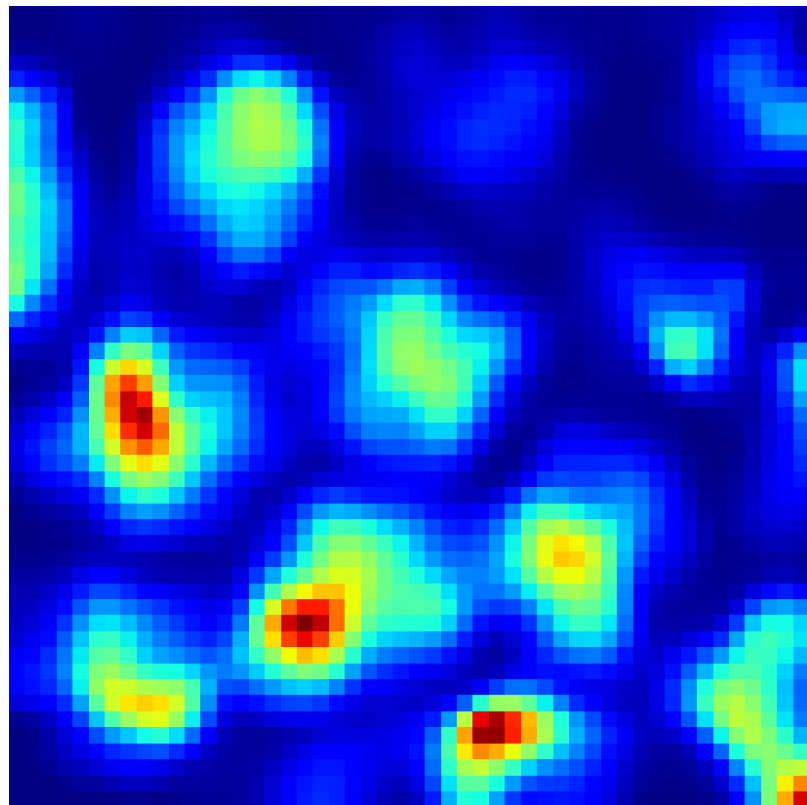

rate  
max.  
0

**B** discommensurate

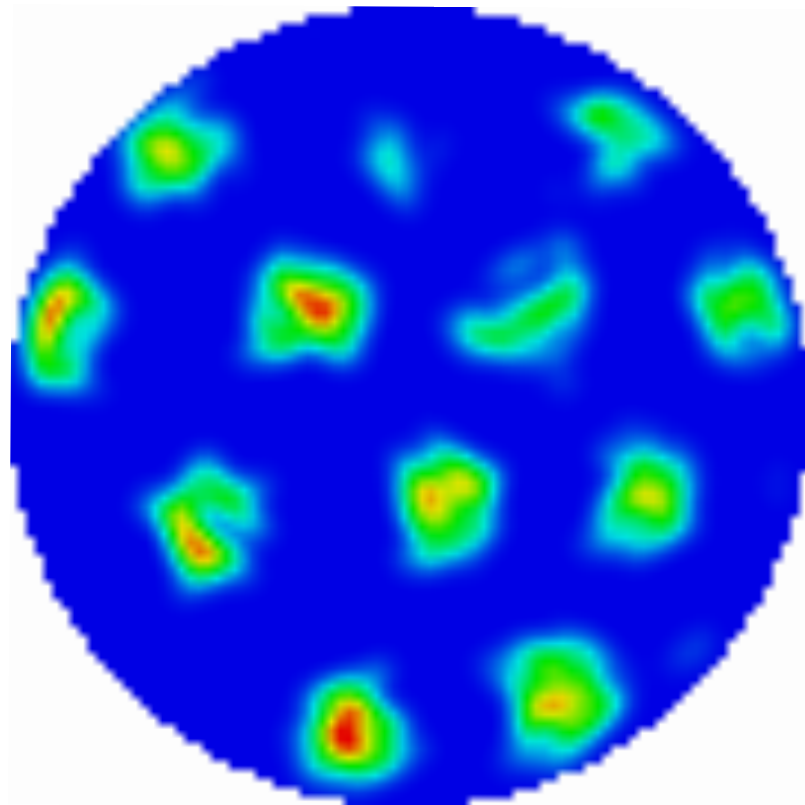

rate  
max.  
0

Supplement: supp [file elife-46687-supp-v1.zip › elife_poa_e46687_Figure_6_figure_supplement_2.pdf]

Figure 2c from Stensola et al. (2012)

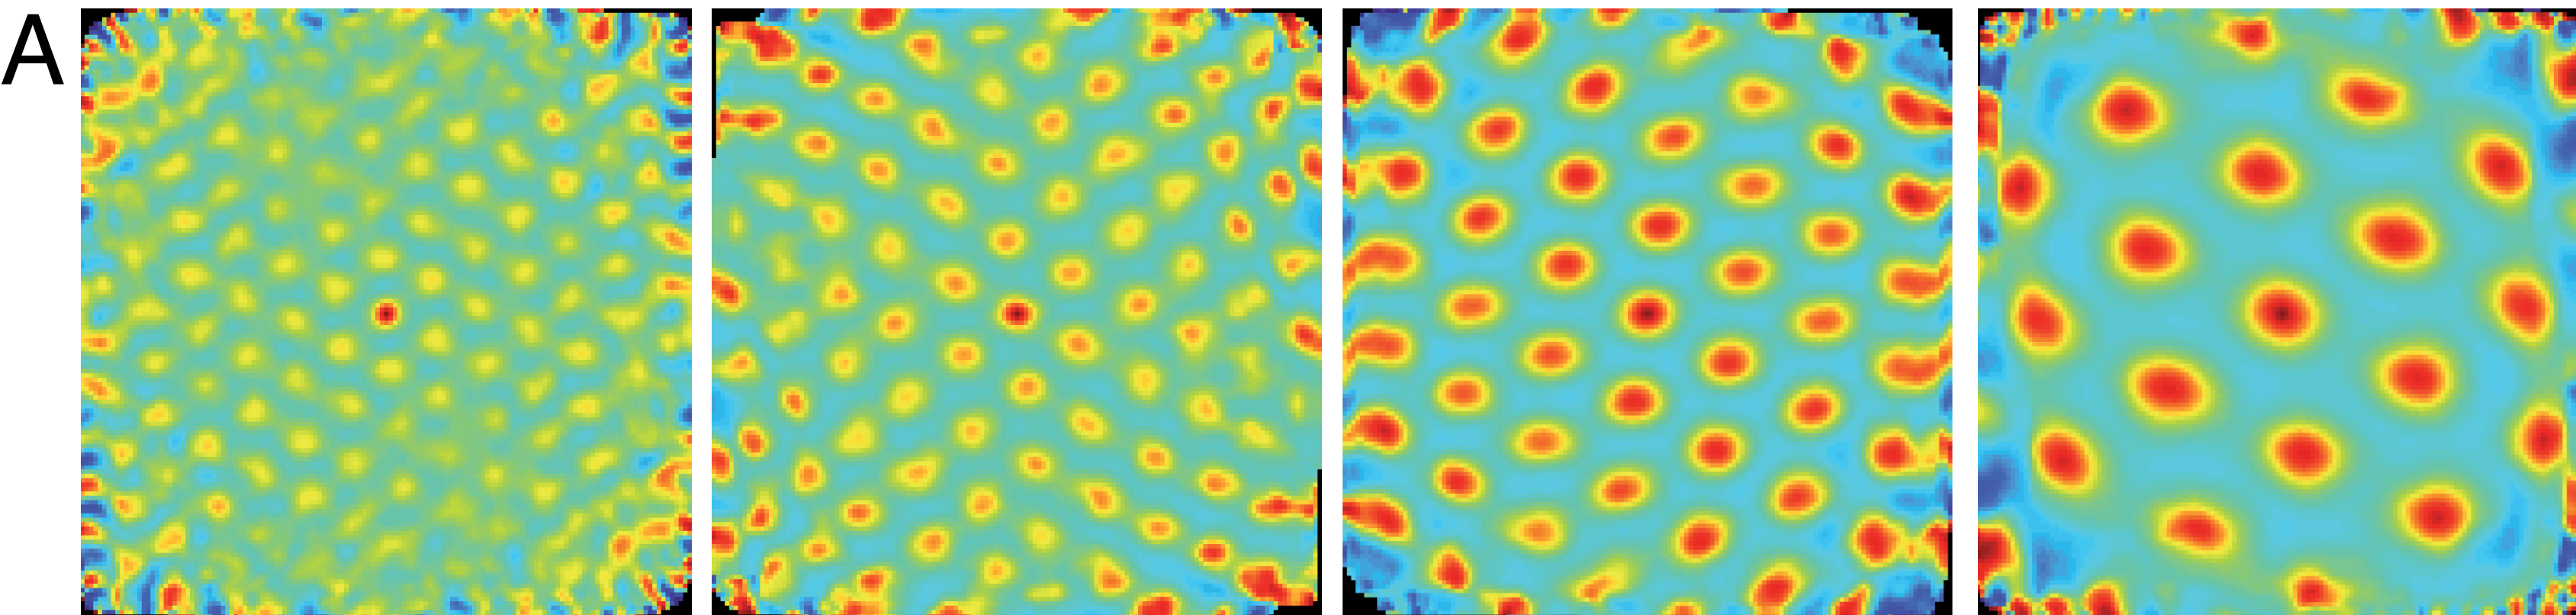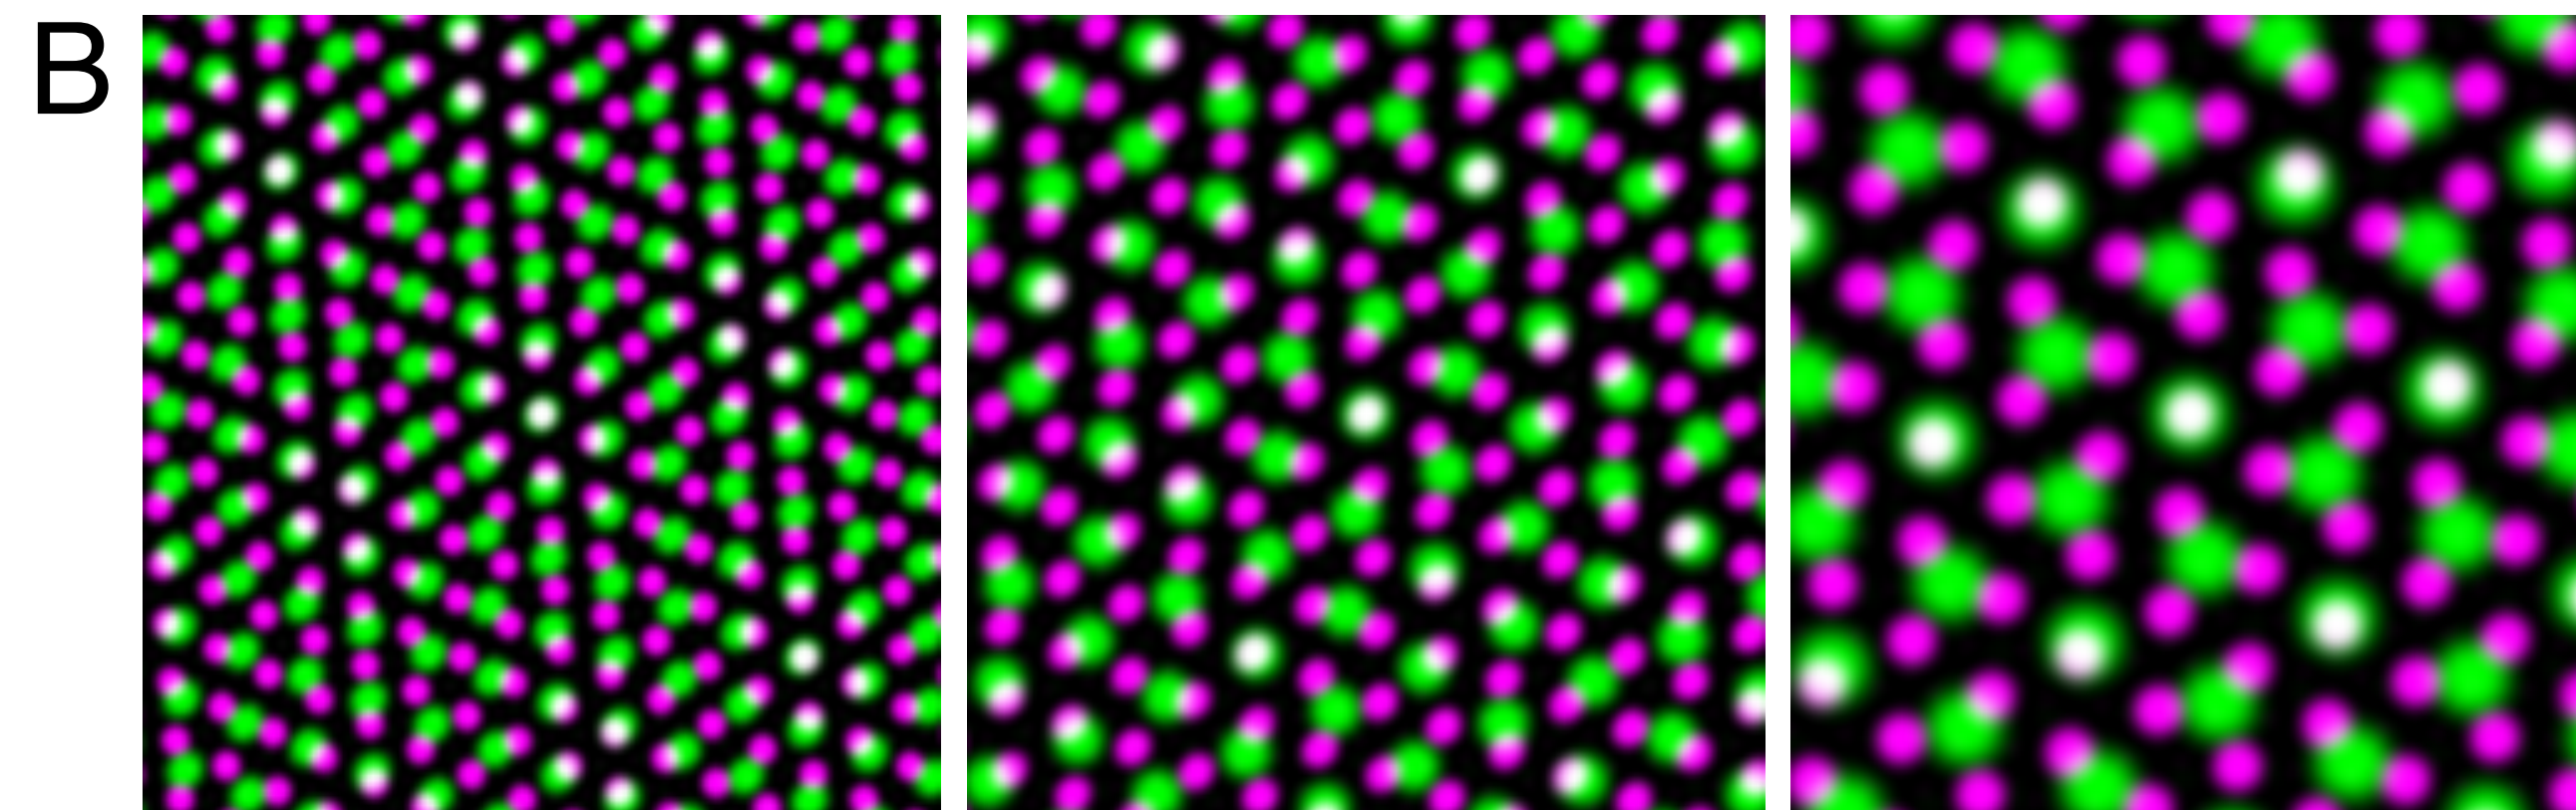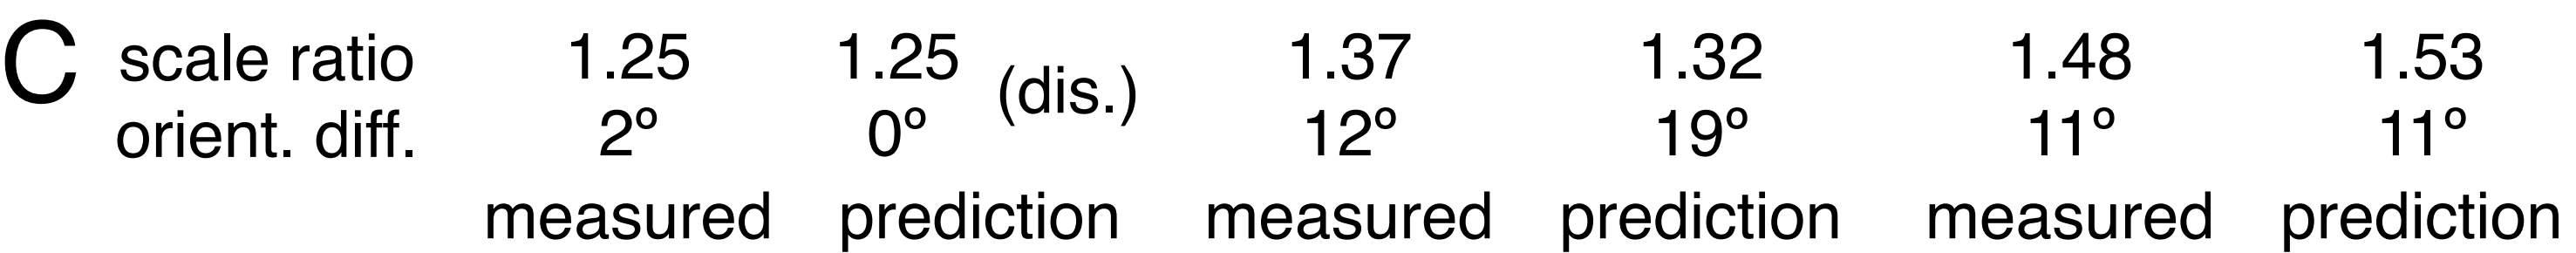

Figure 2d from Krupic et al. (2015)

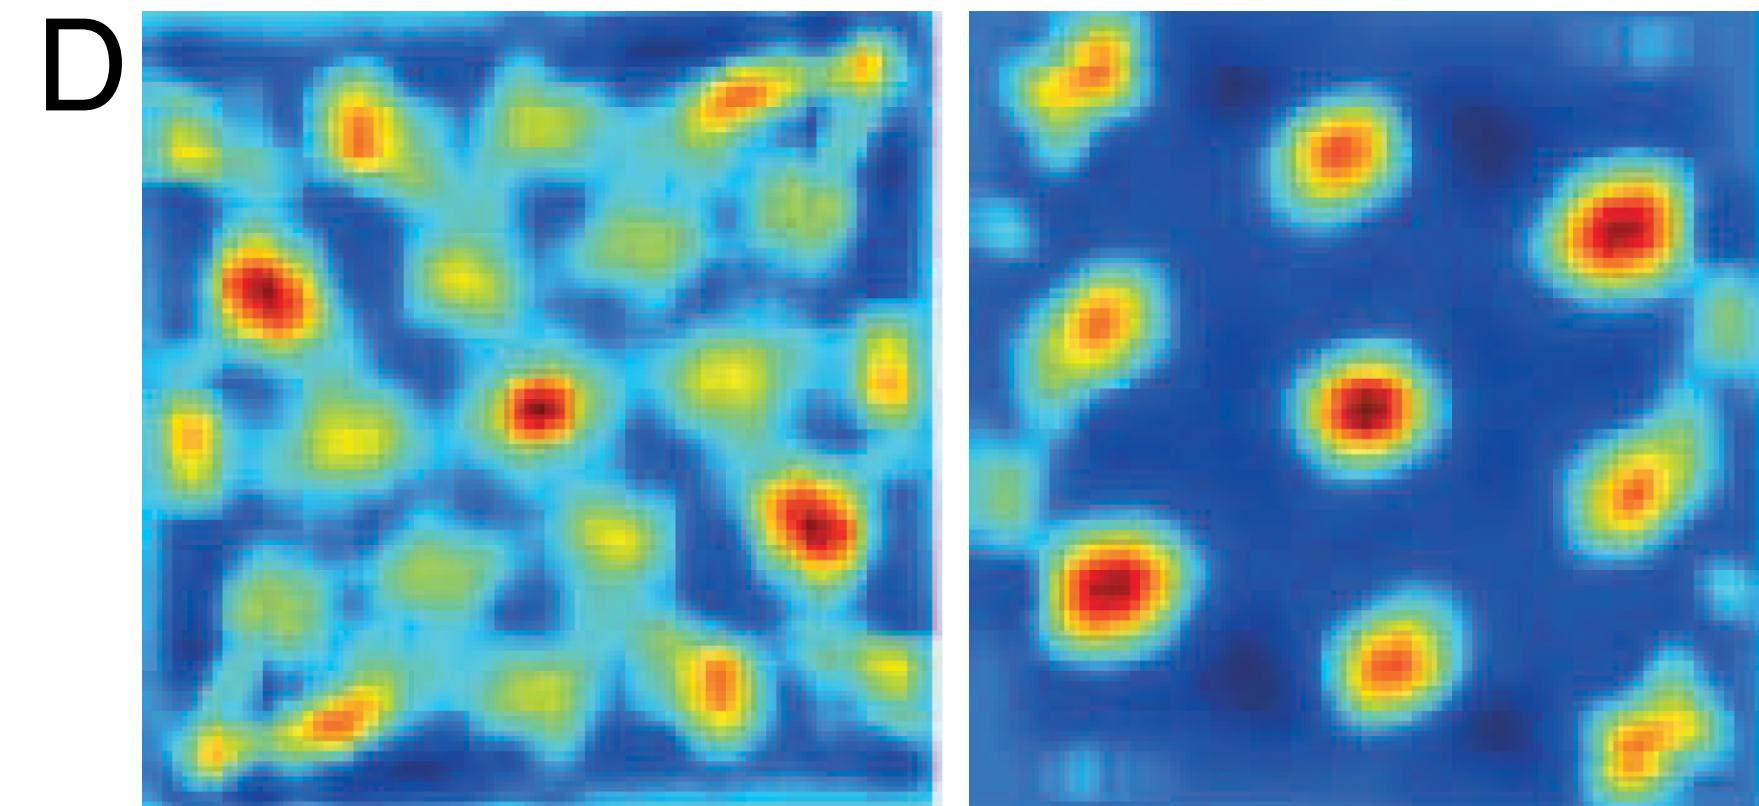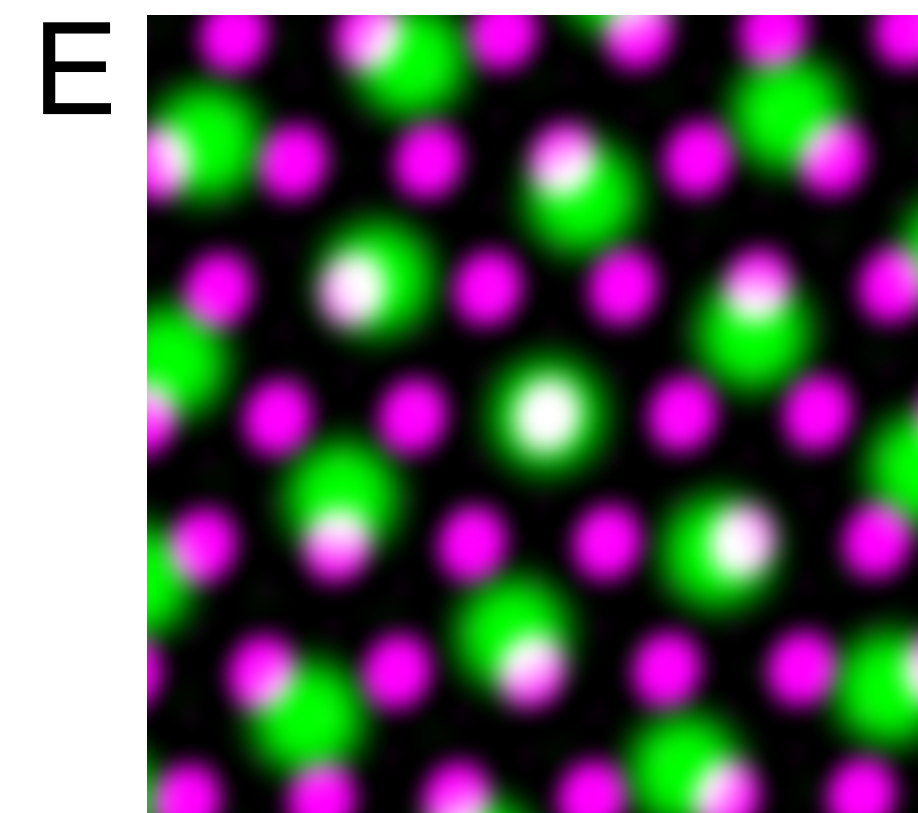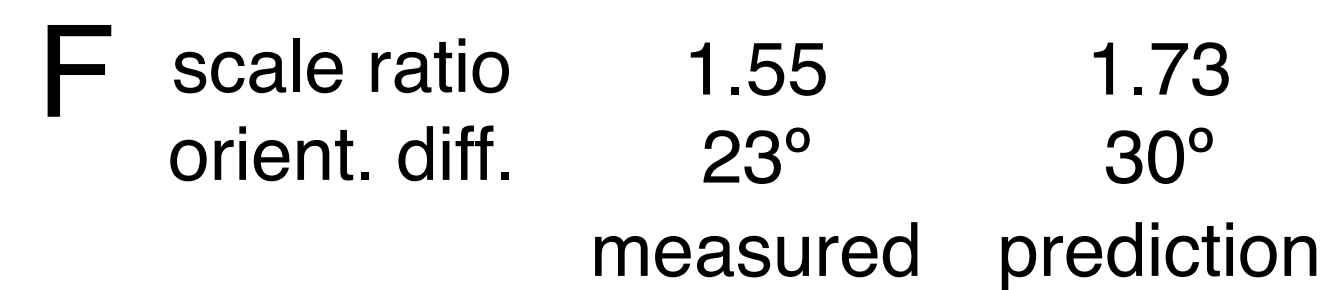

Supplement: supp [file elife-46687-supp-v1.zip › elife_poa_e46687_Figure_7_figure_supplement_2.pdf]
